# Supplementary material
Source: PubMed Central journal article supplement (PMC9932991)
Supplement: mmc4.pdf [file mmc4.pdf]

# Altered and allele-specific open chromatin landscape reveals epigenetic and genetic regulators of innate immunity in COVID-19

## Graphical abstract

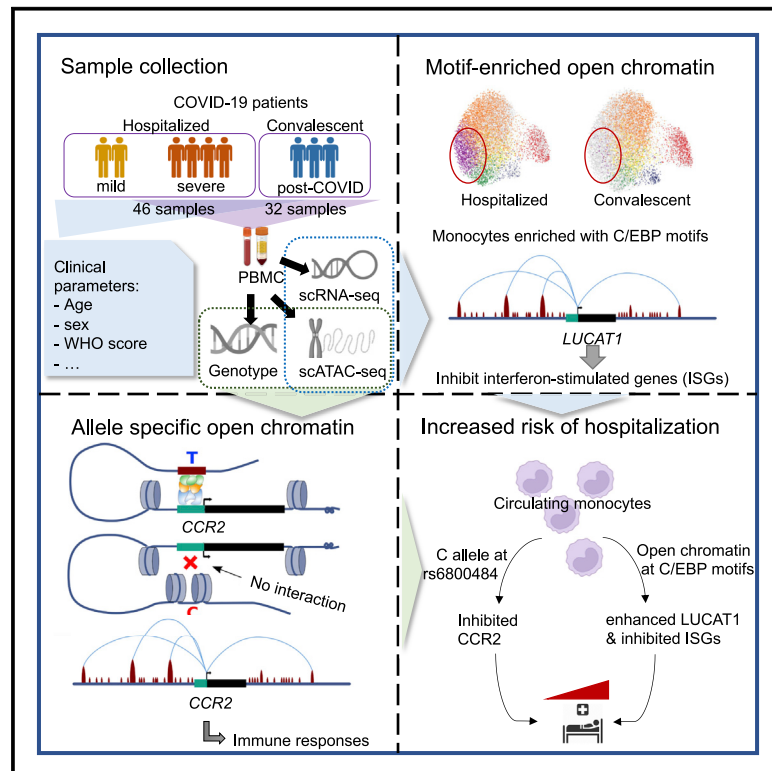

## Authors

Bowen Zhang, Zhenhua Zhang, Valerie A.C.M. Koeken, ..., Markus Cornberg, Leon N. Schulte, Yang Li

## Correspondence

yang.li@helmholtz-hzi.de

## In brief

With a single-cell multi-omics study, Zhang et al. linked both genetic and epigenetic regulation to transcriptional responses in COVID-19 patients. Their findings suggest the identification of underlying regulators of innate immune dysfunction in COVID-19 patients and the regulatory roles of known genetic risk loci in the COVID-19 pathogenesis.

## Highlights

- Massive regulatory changes can be found in monocytes of COVID-19 patients
- Hospitalization is marked by open chromatin of C/EBP motifs in classical monocytes
- Interaction of C/EBPs with gene *LUCAT1* highlighted the epigenetic regulator
- Allele-specific open chromatin explains the regulatory role of genetic risk loci

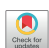

## Article

# Altered and allele-specific open chromatin landscape reveals epigenetic and genetic regulators of innate immunity in COVID-19

Bowen Zhang,<sup>1,2,3,19</sup> Zhenhua Zhang,<sup>1,2,4,5,19</sup> Valerie A.C.M. Koeken,<sup>1,2,6,19</sup> Saumya Kumar,<sup>1,2</sup> Michelle Aillaud,<sup>7</sup> Hsin-Chieh Tsay,<sup>1,2</sup> Zhaoli Liu,<sup>1,2</sup> Anke R.M. Kraft,<sup>1,2,8,9,10</sup> Chai Fen Soon,<sup>2,8</sup> Ivan Odak,<sup>11</sup> Berislav Bošnjak,<sup>11</sup> Anna Vlot,<sup>12</sup> Deutsche COVID-19 OMICS Initiative (DeCOI), Morris A. Swertz,<sup>4,5</sup> Uwe Ohler,<sup>12</sup> Robert Geffers,<sup>13</sup> Thomas Illig,<sup>14,15</sup> Jochen Huehn,<sup>10,16</sup> Antoine-Emmanuel Saliba,<sup>17</sup> Leif Erik Sander,<sup>14,18</sup> Reinhold Förster,<sup>9,10,11</sup> Cheng-Jian Xu,<sup>1,2,6,8</sup> Markus Cornberg,<sup>1,2,8,9,10</sup> Leon N. Schulte,<sup>7,14</sup> and Yang Li<sup>1,2,6,10,20,\*</sup>

<sup>1</sup>Department of Computational Biology for Individualised Infection Medicine, Centre for Individualised Infection Medicine (CiiM), a joint venture between the Helmholtz-Centre for Infection Research (HZI) and the Hannover Medical School (MHH), Hannover, Germany

<sup>2</sup>TWINCORE, a joint venture between the Helmholtz-Centre for Infection Research (HZI) and the Hannover Medical School (MHH), Hannover, Germany

<sup>3</sup>Beijing Normal University, College of Life Sciences, Beijing, China

<sup>4</sup>Genomics Coordination Center, University of Groningen and University Medical Center Groningen, Groningen, the Netherlands

<sup>5</sup>Department of Genetics, University of Groningen and University Medical Center Groningen, Groningen, the Netherlands

<sup>6</sup>Department of Internal Medicine and Radboud Center for Infectious Diseases (RCI), Radboud University Medical Center, Nijmegen, the Netherlands

<sup>7</sup>Institute for Lung Research, Philipps University, Marburg, Germany

<sup>8</sup>Department of Gastroenterology, Hepatology and Endocrinology, Hannover Medical School, Hannover, Germany

<sup>9</sup>German Centre for Infection Research (Deutsches Zentrum für Infektionsforschung [DZIF]), Partner Site Hannover-Braunschweig, Hannover, Germany

<sup>10</sup>Cluster of Excellence Resolving Infection Susceptibility (RESIST; EXC 2155), Hannover Medical School, Hannover, Germany

<sup>11</sup>Institute of Immunology, Hannover Medical School, Hannover, Germany

<sup>12</sup>Berlin Institute for Medical Systems Biology (BIMSB), Max Delbrück Center for Molecular Medicine in the Helmholtz Association (MDC), Berlin, Germany

<sup>13</sup>Genome Analytics, Helmholtz-Center for Infection Research (HZI), Braunschweig, Germany

<sup>14</sup>German Center for Lung Research (DZL), Giessen, Germany

<sup>15</sup>Hannover Unified Biobank, Hannover Medical School, Hannover, Germany

<sup>16</sup>Department of Experimental Immunology, Helmholtz Centre for Infection Research, Braunschweig, Germany

<sup>17</sup>Helmholtz Institute for RNA-based Infection Research (HIRI), Helmholtz-Centre for Infection Research (HZI), Würzburg, Germany

<sup>18</sup>Charité–Universitätsmedizin Berlin, Department of Infectious Diseases and Respiratory Medicine, Charité, Universitätsmedizin Berlin, Berlin, Germany

<sup>19</sup>These authors contributed equally

<sup>20</sup>Lead contact

\*Correspondence: [yang.li@helmholtz-hzi.de](mailto:yang.li@helmholtz-hzi.de)

<https://doi.org/10.1016/j.xgen.2022.100232>

## SUMMARY

Severe acute respiratory syndrome coronavirus 2 (SARS-CoV-2) infection causes severe COVID-19 in some patients and mild COVID-19 in others. Dysfunctional innate immune responses have been identified to contribute to COVID-19 severity, but the key regulators are still unknown. Here, we present an integrative single-cell multi-omics analysis of peripheral blood mononuclear cells from hospitalized and convalescent COVID-19 patients. In classical monocytes, we identified genes that were potentially regulated by differential chromatin accessibility. Then, sub-clustering and motif-enrichment analyses revealed disease condition-specific regulation by transcription factors and their targets, including an interaction between *C/EBPs* and a long-noncoding RNA *LUCAT1*, which we validated through loss-of-function experiments. Finally, we investigated genetic risk variants that exhibit allele-specific open chromatin (ASoC) in COVID-19 patients and identified a SNP rs6800484-C, which is associated with lower expression of *CCR2* and may contribute to higher viral loads and higher risk of COVID-19 hospitalization. Altogether, our study highlights the diverse genetic and epigenetic regulators that contribute to COVID-19.

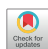

## INTRODUCTION

COVID-19 is caused by severe acute respiratory syndrome coronavirus 2 (SARS-CoV-2),<sup>1</sup> and clinical symptoms of patients with SARS-CoV-2 infection range from asymptomatic to severe pneumonia and acute respiratory distress syndrome.<sup>2</sup> Although vaccines reduce the risk of major illness and mortality, the molecular mechanisms underlying the heterogeneous outcome in disease presentation remain unclear.<sup>3</sup>

A number of studies have examined the complex interplay between peripheral blood leukocytes in COVID-19 and linked immune activation and specific cell subsets to disease severity.<sup>4,5</sup> The adaptive immune system is clearly linked to disease presentation, because prominent lymphopenia is a hallmark of severe disease.<sup>6</sup> Alterations in T cell function have also been observed, with T cells from severe patients showing increased signs of migration to inflamed site and apoptosis<sup>7</sup> and excessive or sub-optimal CD4<sup>+</sup> and CD8<sup>+</sup> T cell responses detected in severe disease.<sup>8</sup> The innate immune system has also been reported to be dysregulated in severe disease, which is characterized by high neutrophil counts,<sup>9</sup> likely contributing to tissue damage and hyperinflammation, dysfunctional monocytes with low expression of HLA-DR and interferon (IFN)-stimulated genes (ISGs),<sup>4</sup> and functionally impaired NK cells.<sup>10</sup> Additionally, long noncoding RNAs are reported to be involved in the regulation of antiviral immune responses in COVID-19 and subsequent disease states.<sup>11</sup> These studies have shed light on the detrimental immune responses that contribute to immunopathology in severe COVID-19.

In addition to studies of molecular signatures, several genome-wide association studies (GWASs) of severe COVID-19 have been performed.<sup>12–14</sup> These revealed the impact of genetic variations on disease severity, improving our understanding of COVID-19 pathology. Moreover, although an epigenetic study on individuals convalescing from COVID-19 revealed remodeling of the chromatin accessibility landscape that established immunological memory,<sup>15</sup> a recent study shows the immune responses and cytokine production capacity generally recover without major sequelae after COVID-19.<sup>16</sup> More importantly, because the majority of these risk factors were identified in noncoding regions, they are predicted to have functional effects on gene expression via transcription factor (TF) binding and interaction with regulatory elements.<sup>17</sup> These regulatory effects are highly cell type specific<sup>18,19</sup> and are not yet understood in relation to COVID-19 risk factors.

Bridging the existing gaps requires an integrative approach that connects genetic variations, epigenetic factors, and immune responses at the cellular level.<sup>20</sup> For this reason, we captured both the transcriptome and epigenome of individual peripheral blood mononuclear cells (PBMCs), as well as genome-wide genotypes, from hospitalized and convalescent COVID-19 samples. We identified *C/EBP*-motif-enriched open chromatin profiles in classical monocytes and illustrated their interaction with the immune-regulatory *LUCAT1* RNA locus using single-cell omics and loss-of-function experiments. Additionally, we demonstrate that COVID-19 GWAS risk variants contribute to the disease by regulating chromatin accessibility through allele-specific open chromatin (ASoC) effects. Our ASoC anal-

ysis reveals that the COVID-19 GWAS risk SNP rs6800484 is associated with the expression of *CCR2* via chromatin accessibility of an enhancer in monocytes. Together, these data indicate that altered chromatin accessibility and ASoC both result in impaired epigenetic regulation that contributes to COVID-19 pathogenesis, while the complex co-action of these factors could lead to heterogeneous and individualized disease outcomes. Our study further provides a broad resource for exploring cell-type-specific genetic and epigenetic regulatory effects that contribute to COVID-19.

## RESULTS

### Study overview and patient population

Using single-cell RNA sequencing (scRNA-seq), single-cell assay for transposase-accessible chromatin using sequencing (scATAC-seq), and genotype array, we examined the transcriptomics and epigenomics of PBMCs, as well as individual genotypes, across 46 hospitalized COVID-19 and 32 convalescent samples from 48 individuals, including 20 individuals from whom we have samples from multiple time points (Figures 1A, 1B, and S1). Hospitalized COVID-19 patients were further allocated to mild or severe patient categories using World Health Organization (WHO) scores (severe: 5–7, mild: 3–4). Clinical characteristics of all study participants are summarized in Table S1.

In total, after quality control, we obtained scRNA-seq data for 165,054 cells from 64 samples ( $n = 37$  active,  $n = 27$  convalescent samples) taken from 41 individuals and scATAC-seq for 46,690 cells from 49 samples ( $n = 25$  hospitalized,  $n = 24$  convalescent samples) taken from 39 individuals (Figure S2). We characterized these cells with unsupervised clustering and, based on the marker genes or gene activity scores in each cluster (Table S2), identified 10 major cell types in the scRNA-seq dataset and 8 major cell types in the scATAC-seq dataset (Figures 1C, 1D, and S3). The relative percentage of cell types in the PBMC fractions of each sample reveals a higher abundance of classical monocytes and a lower abundance of non-classical monocytes, as well as CD4<sup>+</sup> and CD8<sup>+</sup> T cells, in hospitalized COVID-19 compared with convalescent patients in both datasets (Figures 1E and S4A, Dirichlet regression test, false discovery rate [FDR] adjusted  $p < 0.05$ ), in line with a recent publication.<sup>21</sup> Additionally, a high proportion of CD163<sup>+</sup> classical monocytes was found in five hospitalized COVID-19 patients (four severe and one mild) exclusively in the scRNA-seq dataset (Figures 1C and 1E).

### Severe and mild COVID-19 patients show different magnitudes of transcriptional responses

Differential expression (DE) tests per cell type between hospitalized and convalescent samples revealed that a large number of differentially expressed genes (DE-Gs) were in NK cells, classical monocytes, and non-classical monocytes (Table S3; Figure S4B), suggesting that these cell types respond most prominently during COVID-19. Within these cell types, a large proportion of DE-Gs were shared between the mild versus convalescent and the severe versus convalescent comparison, especially for classical monocytes (Figure 1F). This suggests that similar transcriptional changes occur in mild and severe COVID-19, and that the difference between mild and severe

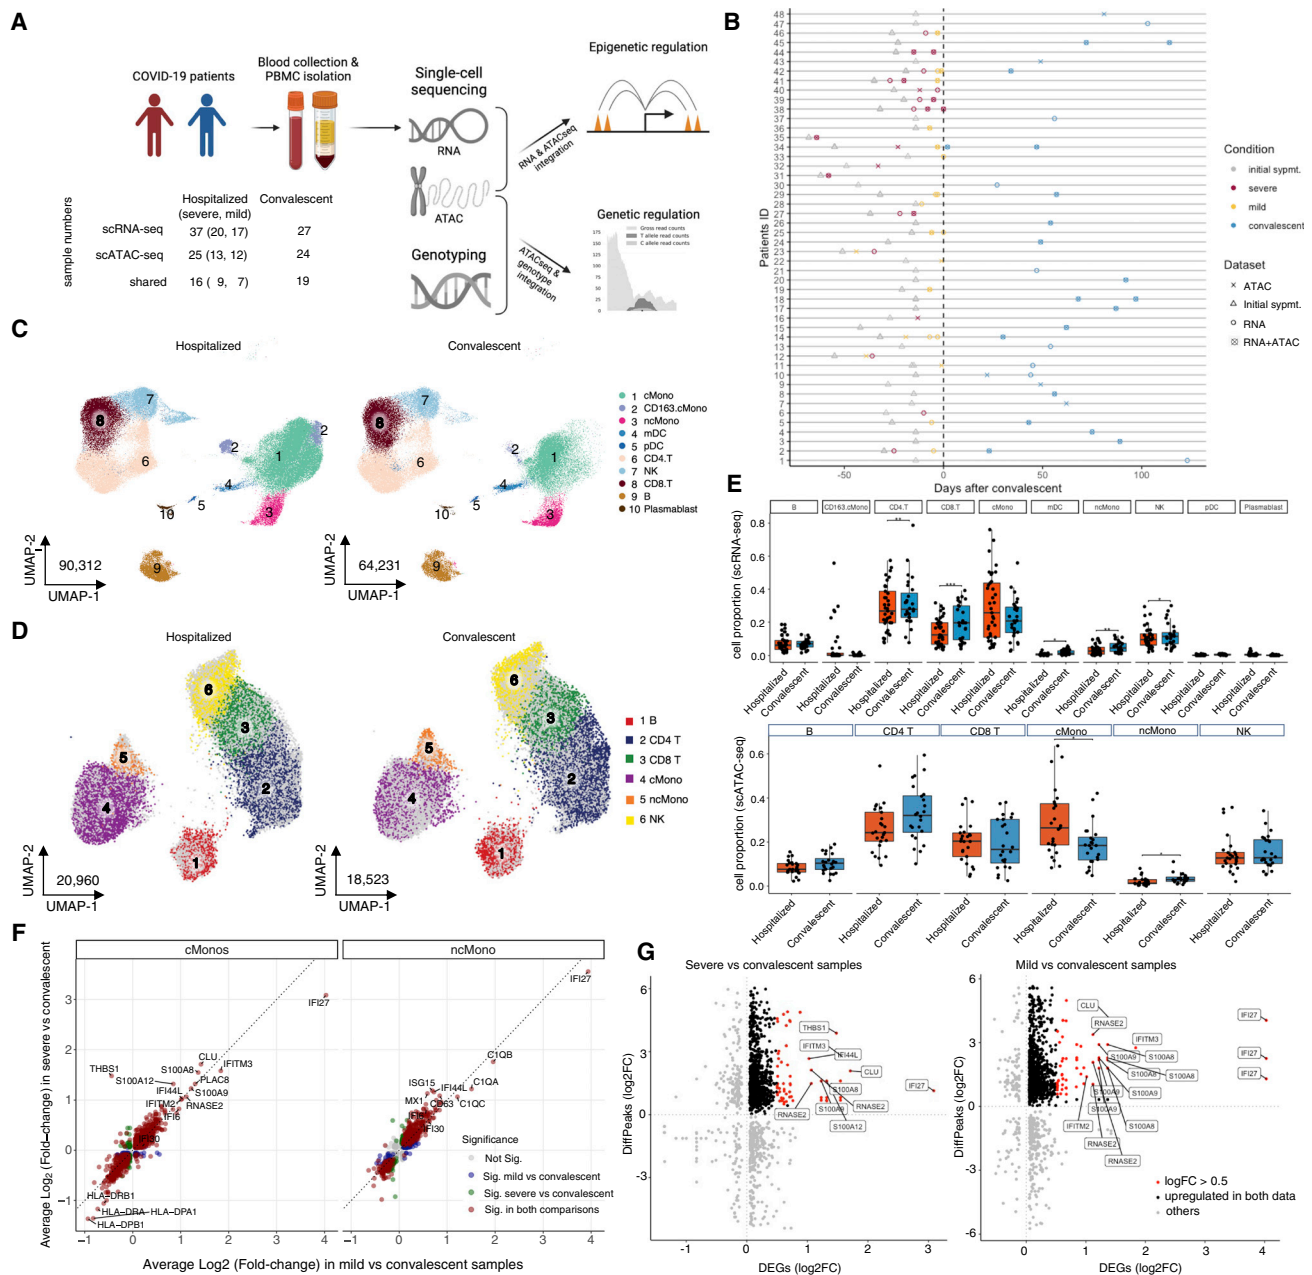

**Figure 1. Study overview and single-cell multi-omics**

- (A) Workflow of the study. Sample numbers in each data layer and disease condition are indicated.
- (B) Schematic overview of all patients enrolled in the study. Sampling dataset, disease conditions, and convalescent days are indicated.
- (C and D) UMAP showing the cell distribution of hospitalized and convalescent conditions in scRNA-seq (C) and in scATAC-seq (D); see also [Figure S3](#) and [Table S2](#) for annotation details.
- (E) Boxplots showing cell proportion of hospitalized and convalescent samples in main cell types of scRNA-seq and scATAC-seq.
- (F) Scatterplots showing the log-fold-change (log<sub>2</sub>FC) of DE-Gs identified in monocytes between the comparison of severe versus convalescent and the comparison of mild versus convalescent. More details on DE-Gs can be found in [Figure S4](#) and [Table S3](#).
- (G) Scatterplots showing the log<sub>2</sub>FC of DE-Gs and log<sub>2</sub>FC of differentially accessible peaks (DAPs) identified in classical monocytes between comparison of severe versus convalescent and comparison of mild versus convalescent. Details of the matched DE-Gs and DAPs can be found in [Table S4](#). See also [Figure S1](#) and [Table S1](#).

COVID-19 is due to a difference in the magnitude of the response, rather than different transcriptional programs. For example, we observed several ISGs, such as *IFI6*, *IFI27*, *IFI30*, and *IFI44L*, to be significantly upregulated in both severe and mild samples compared with convalescent samples, whereas a significantly higher expression of *IFI27* and *IFITM3* was detected in mild patients compared with severe patients, reminiscent of the results of a previous study.<sup>4</sup> Gene-enrichment analysis using the Kyoto Encyclopedia of Genes and Genomes (KEGG) pathway database showed a clear upregulation of oxidative phosphorylation, across different immune cells, in both mild and severe COVID-19, as well as an enrichment of immune-related pathways, such as antigen processing and presentation and phagosome (Figure S4C).

### Differential open chromatin accessibility contributes to transcriptional differences between hospitalized and convalescent COVID-19 patients

To reveal epigenetic alterations at the level of chromatin accessibility in COVID-19, we explored open chromatin signatures of PBMCs across the different disease conditions. Among all 49 samples, 15% of the 157,330 reproducible peaks are in promoter regions, while 32% and 45% are located in intergenic and intronic regions, respectively. When comparing across cell types and conditions, we observed no general enrichment of cell-type- or condition-specific peaks in the promoter or enhancer region (Figure S5A). We noticed that among all cell types, the number of open chromatin peaks is highest in classical monocytes, where it is significantly higher in samples from hospitalized than from convalescent COVID-19 patients (chi-square test,  $p < 2.22 \times 10^{-16}$ ). When comparing peaks from one cell type with all other cell types, a large number of cell-type-specific peaks were identified. This includes 17,105 peaks specific for classical and/or non-classical monocytes (FDR-adjusted  $p < 0.05$  and log-fold-change [ $\log_2FC$ ]  $> 0.5$ , compared with other cell types), which comprise 10.9% of all peaks in our data. Next, we investigated the condition-specific peaks by comparing open chromatin peaks between disease conditions (hospitalized versus convalescent, mild versus convalescent, and severe versus convalescent) within each cell type. The lack of genome-wide significant condition-specific peaks (FDR-adjusted  $p < 0.05$ ) suggests that cell types contribute more than disease conditions to variation in open chromatin accessibility.

To test the regulatory impact of open chromatin marks on transcriptional responses, we integrated the significant DE-Gs (Bonferroni-corrected  $p < 0.05$ ) described above with the nominal differential peaks ( $p < 0.05$ ) through peak-to-gene linkages, i.e., correlating the gene expression from scRNA-seq and peak accessibility from scATAC-seq (Table S4; for details, see STAR Methods). Interestingly, we observed an enrichment of open chromatin peaks that associated DE-Gs in classical monocytes in both severe and mild patients (Fisher exact test, FDR-adjusted  $p = 6.03 \times 10^{-4}$  and  $4.08 \times 10^{-4}$ , respectively), which includes in total 977 out of 2,367 (41.3%) genes that are upregulated in either severe or mild comparing with convalescent patients (Figures 1G and S5B). These results illustrate that there is a large overlap of changes in chromatin accessibility and gene expression in the monocyte compartment during COVID-19, sug-

gesting the underlying epigenetic regulation on transcriptional responses.

### Motif enrichment reveals different transcriptional regulation between hospitalized and convalescent COVID-19 in classical monocytes

To further characterize the epigenetic regulation of gene expression in COVID-19, we performed TF motif-enrichment analysis for the open chromatin peaks identified in each cell type and condition. In total, we found 60 TFs with significantly enriched motifs among the identified peaks. This included *SPI1* (*PU.1*), *JUN/FOS*, and *C/EBP* motifs, which were enriched in classical monocytes in both hospitalized and convalescent COVID-19 patients. Of note, *C/EBP* motifs (*CEBPA*, *CEBPB*, *CEBPD*, *CEBPE*, and *CEBPG*) are even more significantly enriched in hospitalized patients than in convalescent patients (Figure 2A). Given their important role in monocyte differentiation and pro-inflammatory activation,<sup>22,23</sup> we further investigated the interaction between these TFs and their targets, which were identified based on the genes with motif-binding peaks in classical monocytes. In total, 4,681 genes were associated with peaks harboring either *SPI1*, *JUN/FOS*, or *C/EBP* motifs, of which 1,514 were also DE-Gs between hospitalized and convalescent COVID-19 in classical monocytes (Table S5).

Interestingly, we found that the long noncoding RNA *LUCAT1* was associated with monocyte-specific accessible peaks harboring *SPI1*, *JUN/FOS*, and *C/EBP* motifs (Figure 2B), suggesting a monocyte-specific influence of the *SPI1*, *JUN/FOS*, and *C/EBP* TFs on *LUCAT1*. Because *LUCAT1* has previously been reported as a negative regulator of IFN responses,<sup>24</sup> we determined the co-expression patterns of *LUCAT1*, the TFs, and the two highly expressed ISGs, *IFI27* and *IFI30*, in classical monocytes. As shown in Figure 2C, the expression of *LUCAT1* is positively correlated with the expression of *SPI1*, *JUN/FOS*, and *CEBPD/CEBPE* TFs but negatively correlated with *IFI27* and *IFI30* expression in active COVID-19 patients. A similar co-expression correlation was observed in convalescent individuals, although the correlations between *LUCAT1* and *CEBPE* or *IFI30* were no longer significant (Figure S5C). Furthermore, in the DE comparison between disease conditions, *SPI1* and *LUCAT1* showed significantly higher expression in severe and mild samples compared with convalescent samples in classical monocytes (Bonferroni-corrected  $p < 0.05$ ; Table S3; Figure 2C), whereas *CEBPD* showed significantly higher expression in severe samples compared with both mild and convalescent ones (Bonferroni-corrected  $p = 3.64 \times 10^{-10}$  [severe versus mild] and  $4.15 \times 10^{-43}$  [severe versus convalescent]). *IFI27* and *IFI30*, as mentioned above, were significantly upregulated in mild samples compared with severe samples (Bonferroni-corrected  $p = 9.23 \times 10^{-71}$  [*IFI27*] and  $3.00 \times 10^{-15}$  [*IFI30*]; Table S3; Figure 2C). Together, these findings indicate a complex interaction of these genes at the expression level through epigenetic regulation that results in their altered expression under different disease conditions.

To validate the interactions between *LUCAT1* and *C/EBPs* in monocytes of COVID-19 patients, we measured the expression of *LUCAT1* in isolated monocytes after inhibiting *C/EBP* using celastrol and betulinic acid (Figure 2D). In unstimulated monocytes, the *C/EBP* inhibitors enhanced *LUCAT1* expression at lower doses

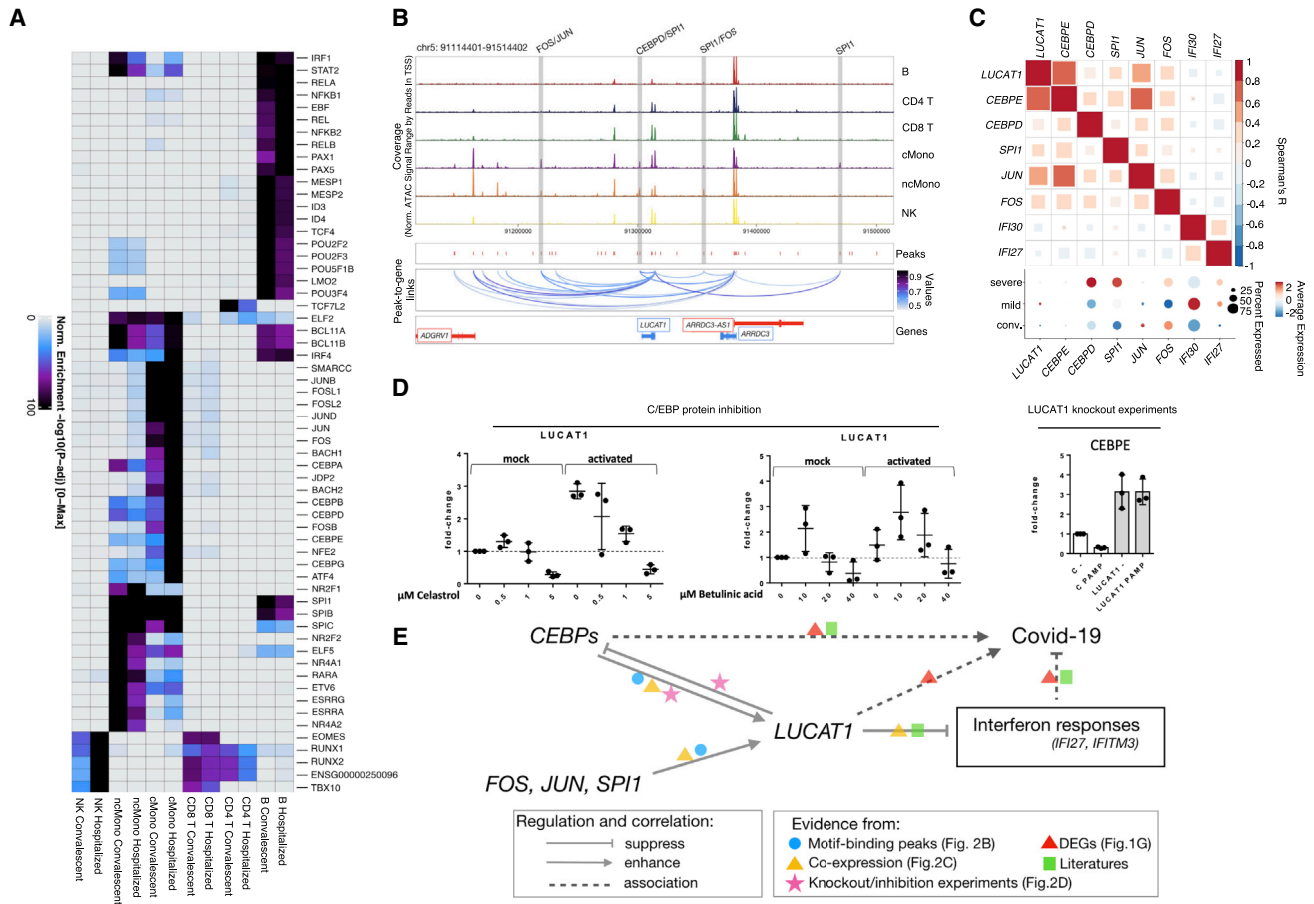

**Figure 2. TF regulation via motifs in the open chromatin peaks**

(A) Heatmap showing the significantly enriched TF motifs in the open chromatin peaks of each cell type and condition. Colors represent  $-\log_{10} p$  value of enrichment. Rows are significantly enriched TF motifs.  
 (B) Track plots showing the peaks around the *LUCAT1* gene. Blue lines indicate inferred linkages between peaks and *LUCAT1* expression.  
 (C) Heatmap showing the expression correlation of *LUCAT1*, *IFI27*, and *IFI30* and TF genes in classical monocytes of hospitalized patients with a dot plot showing the expression of these genes in different conditions.  
 (D) Boxplots showing the molecular responses after knockdown of *SPI1* and *LUCAT1* or inhibition of C/EBP proteins.  
 (E) Schematic plot summarizing the potential regulating program in *LUCAT1*, *SPI1*, and *C/EBP*, as well as ISG, and COVID-19 severity.  
 See also [Figure S5](#) and [Table S5](#).

but suppressed *LUCAT1* expression at higher doses. In monocytes activated with a cocktail of interleukin (IL)-1 $\alpha$ , IFN $\alpha$ , and 3p-hairpin RNA (viral mimic), both inhibitors suppressed *LUCAT1* expression. In addition, in a stable *LUCAT1* knockdown monocyte cell line, we observed increased *CEBPE* expression (Figure 2D), which indicates strong negative feedback of *LUCAT1* to upstream regulatory C/EBP TFs. Because *LUCAT1* was previously reported to suppress inflammatory and ISGs,<sup>24</sup> and ISGs are suppressed in severe COVID-19 patients,<sup>4</sup> we speculate that the interaction of *LUCAT1*, *SPI1*, and *C/EBPs* inhibits ISG responses, resulting in a more severe condition in COVID-19 patients (Figure 2E).

### Single-cell RNA and ATAC profiles revealed altered C/EBP regulation in a monocyte subset associated with oxygen supply of COVID-19 patients

To further investigate the heterogeneity of gene regulation in the monocyte compartment of COVID-19 patients, we

explored disease condition-specific subsets. Subsampling the monocytes and sub-clustering them revealed eight transcriptionally distinct cell clusters (R1–R8; Figure 3A), from which R3, R4, and R8 were largely contributed by hospitalized COVID-19 patients. Through the DE tests comparing expression of gene between one cluster with the rest of the clusters and visualization of selected marker gene expression by Uniform Manifold Approximation and Projection (UMAP) (Table S6; Figure 3B), we identified R1 as CD14<sup>−</sup>CD16<sup>+</sup> non-classical monocytes and R2–R8 as CD14<sup>+</sup>CD16<sup>−</sup> classical monocytes. In the classical monocytes, *CEBPD* and *SPI1* TFs were expressed similarly among all clusters. However, a more distinctive expression pattern was observed for the previously mentioned TF target genes. *LUCAT1* was significantly higher expressed in R2 and R8 compared with the other clusters (Bonferroni-corrected  $p < 2.22 \times 10^{-16}$ ; Table S6), while ISGs such as *IFI27*, *IFI30*, and *IFITM3* showed

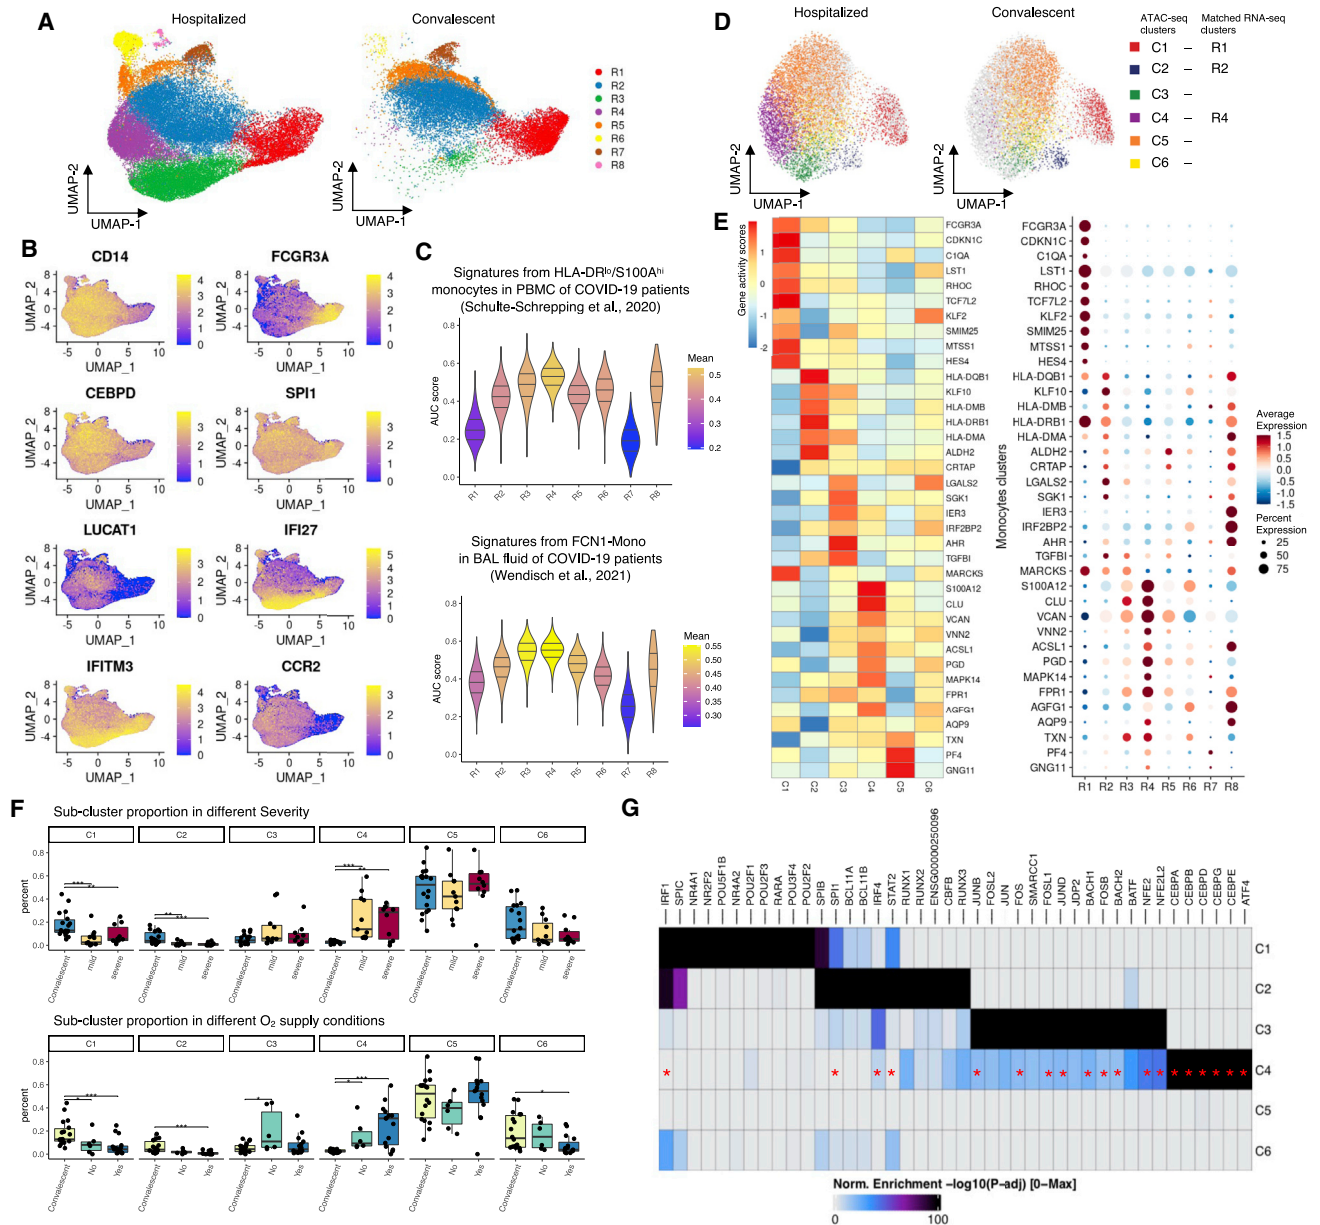

**Figure 3. RNA and ATAC profiles in monocyte sub-clusters in hospitalized and convalescent COVID-19 patients**

(A) UMAP showing the cell distribution of hospitalized and convalescent conditions in monocyte sub-clusters of scRNA-seq.

(B) Expression of marker genes in monocyte sub-clusters. See also [Table S6](#) for all the markers.

(C) Violin plots showing the AUCell-based gene signature scores for each sub-cluster from HLA-DR<sup>hi</sup>/S100A<sup>hi</sup> monocytes in PBMCs (Schulte-Schrepping et al.<sup>4</sup>) and infiltrating monocytes (FCN1-Mono) in bronchoalveolar lavage (BAL) fluid (Wendisch et al.<sup>25</sup>).

(D) UMAP showing the monocyte sub-clusters of scATAC-seq.

(E) Dot plots and heatmap showing the expression and imputed activity scores of shared marker genes identified in monocyte sub-clusters of scRNA-seq and scATAC-seq, respectively.

(F) Boxplots showing the cell proportion of severe, mild, and convalescent patients, as well as oxygen supply needed, not needed, and convalescent patients in each monocytes sub-cluster of scRNA-seq. See the cell distributions in [Figure S8](#).

(G) Heatmap showing the significantly enriched TF motifs in the open chromatin peaks of each monocytes sub-cluster; TFs that were also enriched as regulon in R4 cluster cells by SCENIC (single-cell regulatory network inference and clustering) are marked with red asterisks. See also [Figures S6–S8](#) and [Table S7](#).

expression predominantly in the R3 cluster (Bonferroni-corrected  $p < 2.22 \times 10^{-16}$ ) (Figure 3B; Table S6).

To validate our findings, we compared our monocyte sub-clusters with the previously published transcriptional markers of monocytes from COVID-19 patients.<sup>4</sup> By applying the AUCell scores based on the top 30 marker genes from the PBMC datasets, we confirmed that R1 is non-classical monocytes, whereas R2–R5 should be classical monocytes (Figure S6A). Additionally, we identified that the hospitalized COVID-19-specific R4 and R8 sub-clusters were similar to HLA-DR<sup>lo</sup>S100A<sup>hi</sup> monocytes (Figure 3C), which are previously found as dysfunctional CD14<sup>+</sup> monocytes in severe COVID-19 patients. Moreover, the ISG-predominated R3 sub-cluster was also found similar to another reported severe COVID-19 patient-specific HLA-DR<sup>lo</sup>CD163<sup>hi</sup> monocyte (Figure S6A).<sup>4</sup> In response to SARS-CoV-2 infection, circulating monocytes could be recruited to the lung tissue and participate in tissue immune responses by further differentiating into macrophages.<sup>26</sup> We therefore assessed the transcriptional similarity between the monocyte sub-clusters and monocytes/macrophages reported in bronchoalveolar lavage (BAL) fluid samples from COVID-19 patients.<sup>25</sup> By applying AUCell scores again to the BAL dataset markers, we identified that the hospitalized COVID-19-specific R3 and R4 were similar to FCN1-Mono in BAL (Figure 3C), which was reported<sup>25</sup> as infiltrating monocytes that would later differentiate toward macrophages, whereas the macrophages themselves were not identified in any of our clusters (Figure S6B). These together suggest that both R3 and R4 sub-clusters were associated with COVID-19 severity and play an important role in the immune responses by infiltrating to the patients' lungs.

Next, we performed sub-clustering on the monocytes from the scATAC-seq data. Unsupervised clustering revealed six epigenetically distinct cell clusters (C1–C6; Figures 3D, S7A, and S7B). Of these, the C4 cluster is specific to hospitalized COVID-19 patients, and the C2 cluster is specific to convalescent patients. Through a multi-omics alignment of the transcriptomic and epigenomic profiles across monocyte sub-clusters (see STAR Methods for details), we confidently matched C1 to R1 as non-classical monocytes, as well as C2 to R2 and C4 to R4 as classical monocytes (with >90% of aligned cells matched; Figures S7C and S7D). This can be confirmed by the shared pattern between gene expression levels of marker genes and estimated gene activity scores of the same marker genes based on peak data (Table S6; Figure 3E). When comparing the cell proportions across different disease conditions, the non-classical monocytes (C1/R1) had a higher abundance in convalescent COVID-19 patients (Figures 3F and S8A) that could be seen even before sub-clustering (Figure 1F). More interestingly, the remaining classical monocytes displayed high heterogeneity of cell proportions, with the C2/R2 and C4/R4 sub-clusters varying dramatically across disease conditions. C2/R2, which expresses *LUCAT1* and harbors a strong antigen-presentation capacity with high expression of MHC class II components (including *HLA-DQA* and *HLA-DPA*), was largely contributed by convalescent patients (Figure 3F). In contrast, the C4/R4 cluster, which is annotated as HLA-DR<sup>lo</sup>S100A<sup>hi</sup> monocytes and shows a reverse expression pattern of MHC class II components and suppressed expression of ISGs, is mainly contributed by hospitalized COVID-19 patients (both mild and severe) and has a higher pro-

portion in patients requiring oxygen supply than in those without (Figure 3F), suggesting a potential correlation between these monocytes and impaired lung function in patients.

To disclose the epigenetic regulation that underpins the transcriptional differences of these monocyte subsets, especially the condition-specific ones, we performed TF motif enrichment for marker peaks identified in each monocyte subset. The results demonstrate a distinct pattern of enriched motifs in different subsets. *SPI1* is enriched in the convalescent-specific R2/C2 subset, together with *RUNX1/2*, *IRF4*, *STAT2*, and *BCL11 A/B*, whereas *C/EBP* motifs (*CEBPA*, *CEBPB*, *CEBPD*, *CEBPG*, and *CEBPE*) are enriched in the hospitalized patient-specific R4/C4 subset, together with an *ATF4* motif (Figure 3G). From the scRNA-seq data, we found that among these TFs, *CEBPD*, *CEBPB*, and *ATF4* were also widely expressed in R4 cells (Figure S8B). Through an independent TF regulon enrichment analysis in R4 cluster cells,<sup>27</sup> we have confirmed that the identified *C/EBPs* and *ATF4* were also high-confidently enriched TFs, together with *IRF4*, *FOS*, *JUNB*, *JUND*, *BACH1*, etc. (red asterisks in Figure 3G; see all enriched TFs in Table S7). This result indicates a shift of the regulatory elements between convalescent and hospitalized COVID-19 patients. Additionally, the suppressed expression of *IFI27* and *IFITM3* in R4 in comparison with R3 (Figure 3B) corresponds to its matched C4 cluster, which was enriched with *C/EBP* motifs. These results again suggest that altered TF motif accessibility may contribute to the dysregulation of IFN responses in COVID-19, and further indicate a potential correlation with the need for oxygen supply of COVID-19 patients.

### COVID-19 GWAS variants are overrepresented in open chromatin regions of classical monocytes

Previous GWASs have revealed a number of genome regions associated with COVID-19 conditions. Therefore, we tested whether the identified GWAS hospitalization risk variants (“Hospitalized covid vs. population”, release 6)<sup>14</sup> have an impact on open chromatin peaks in specific immune cell types. Our data reveal that these variants are significantly enriched in open chromatin peaks of classical monocytes from hospitalized COVID-19 patients (Fisher exact test,  $p = 2.98 \times 10^{-12}$ ) and of CD4<sup>+</sup> T cells from convalescent individuals (Fisher exact test,  $p = 2.68 \times 10^{-6}$ ) compared with the other conditions and cell types. In classical monocytes, risk variants on chromosomes (chr) 3, 12, 17, and 21 were found to be located in several open chromatin peaks that were highly accessible in hospitalized patients (Figures 4A, 4B, and S9). When looking at the genes linked to the risk variant peaks mapped using the aforementioned method of peak-to-gene linkage (see STAR Methods), we identified significantly elevated expression (Wilcoxon rank-sum test, Bonferroni-corrected  $p < 0.05$ ) of *CCR1* and *CCR2* (chr3), *OAS3* (chr12), and *IFNAR1* and *IFNGR2* (chr21) in hospitalized patients compared with convalescent individuals in classical monocytes (Figure 4C). These results suggest that several GWAS risk variants may impact the expression of linked immune response genes through epigenetic regulation.

### ASoC analysis reveals epigenetic effects of genetic variants

To further investigate the epigenetic effects of genetic variants, we evaluated the ASoC, which represents the imbalance of



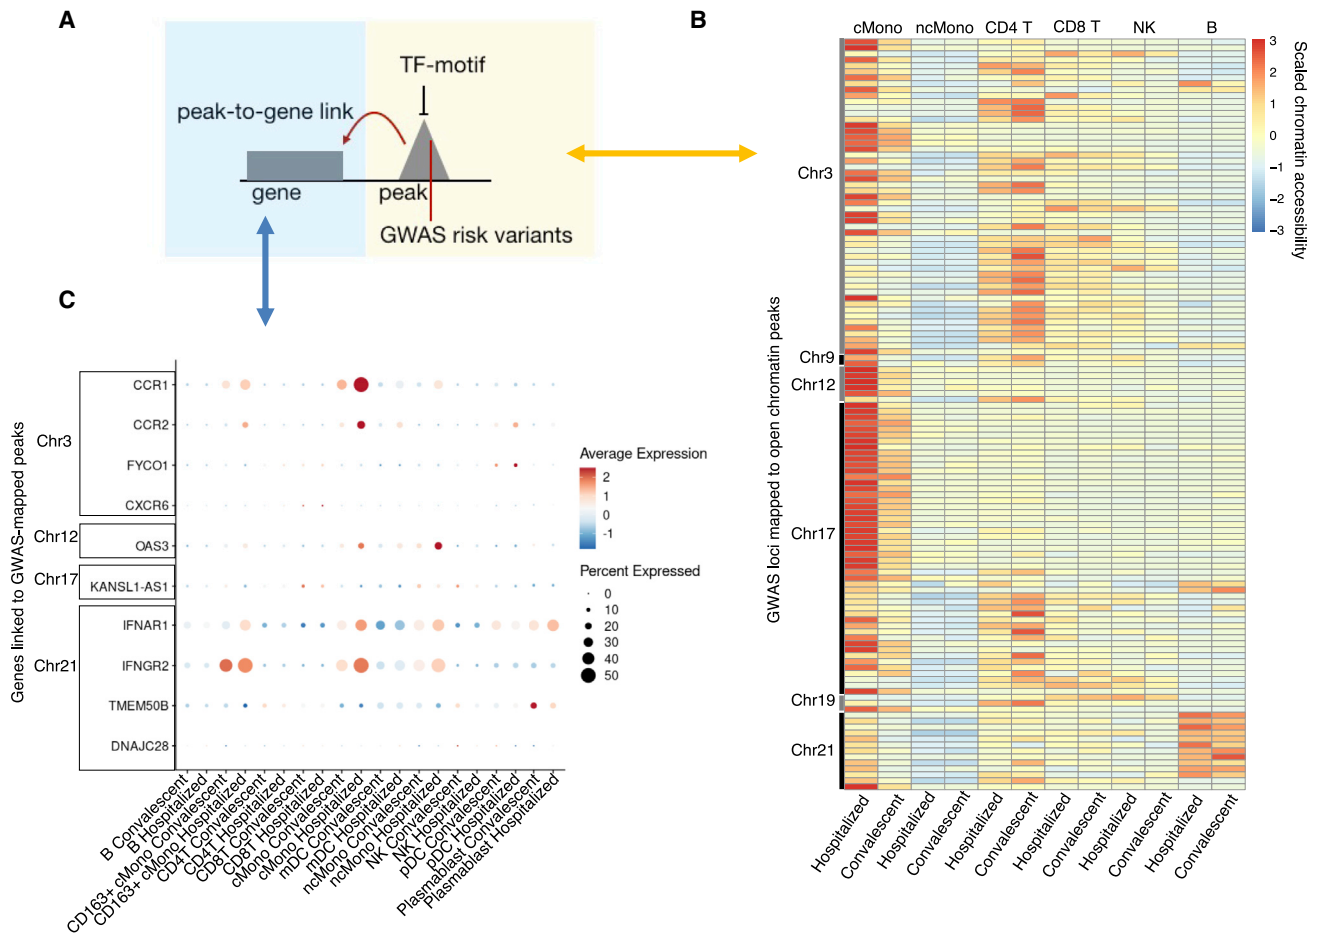

**Figure 4. GWAS risk variants associated with peaks and genes**

(A) Schematic plot showing the potential regulatory role of a GWAS risk variant located in an open chromatin peak that is bound by the TF motif and associated with gene expression.

(B) Heatmap showing chromatin accessibility of peaks detected with hospitalized COVID-19 risk variants. More details can be found in Figure S9.

(C) Dot plots showing the expression of DE-Gs associated with peaks from (B).

chromatin accessibility between alleles, at heterozygous SNPs by integrating scATAC-seq and SNP data from the same individuals. In total, 292 and 86 ASoC SNPs were identified in hospitalized and convalescent COVID-19 individuals, respectively (FDR-adjusted  $p < 0.05$ ; Figures 5A and S10A–S10C). Of these identified ASoC SNPs, about 5% were shared by hospitalized and convalescent conditions, which is in contrast with the fact that the majority of heterozygous SNPs (89.18%) available for testing the ASoC effect were shared by participants between conditions. This result suggests there is distinct allele-specific regulation in open chromatin regions between hospitalized and convalescent COVID-19 patients.

As shown in Figure 5B, the majority of ASoC SNPs were located in enhancer (>25%) or promoter (>65%) regions, suggesting that epigenetic regulations occur in regulatory DNA sequences. In whole-blood samples, more than 55% of ASoC SNPs were reported to be associated with the expression of nearby genes (expression quantitative trait loci or eQTL),<sup>28</sup> which indicates that these ASoC SNPs potentially affect gene expres-

sion by controlling allele-specific chromatin accessibility. In addition, in our scRNA-seq analysis for about 10% of ASoC SNPs, the nearby genes (of which promoters overlap with at least one ASoC SNP) were identified to be differentially expressed in at least one cell type (i.e., cell-type-dependent DE-Gs identified by comparisons between conditions). Further enrichment analysis revealed an over-representation of ASoC SNPs assigned to DE-Gs in COVID-19 patients (Fisher exact test, FDR-adjusted  $p < 0.05$ ; Figure 5C), suggesting that the genetic risk variants have an impact on the transcriptional responses to SARS-CoV-2 infection through allele-specific chromatin accessibilities. Of note, we also observed that the ASoC SNPs were enriched in enhancer regions in hospitalized patients (Fisher exact test,  $p = 0.047$ ), but not in the convalescent ones, showing the alteration of transcriptional profiles/activities in hospitalized COVID-19 patients compared with convalescent ones.

When zooming in on cell subsets, the ASoC SNPs we identified show significant over-representation in open chromatin regions (Figure S10D) and TF binding sites (TFBSs) (Figure S10E).

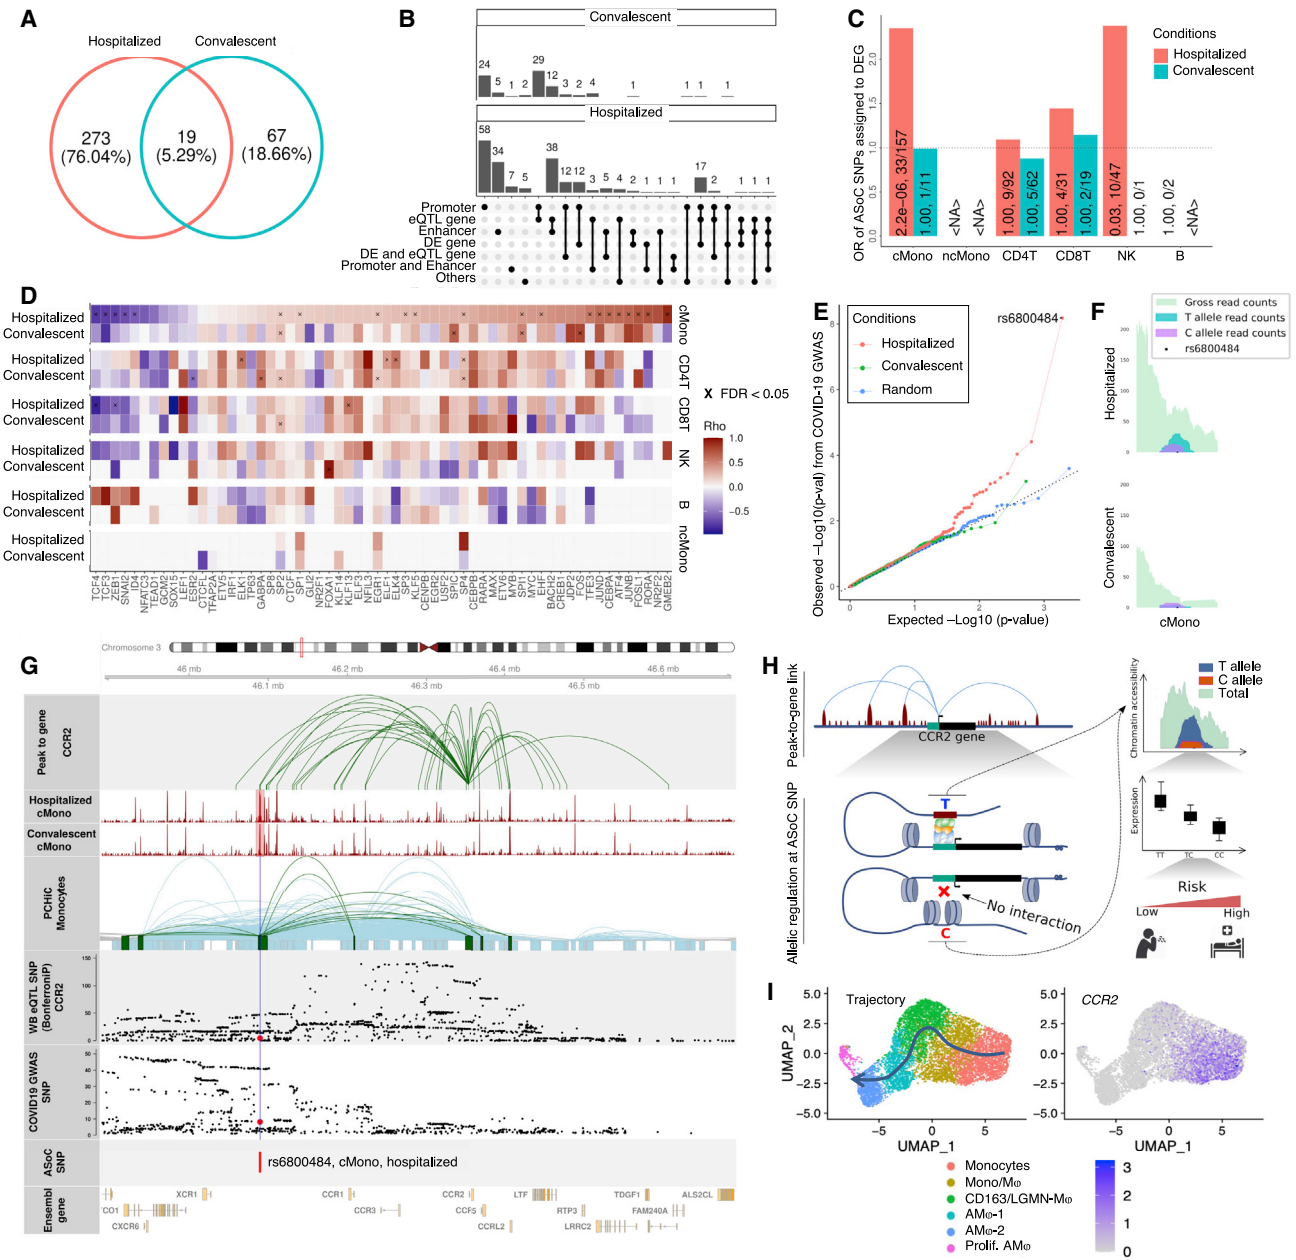

**Figure 5. ASoC analysis reveals the epigenetic effect of COVID-19 GWAS variants**

(A) Venn diagram of ASoC SNPs identified in six cell types from hospitalized and convalescent participants. ASoC SNPs were merged per disease condition. ASoC SNPs identified in more than one cell type were counted once.

(B) Upset plot showing functional annotation of identified ASoC SNPs. Regulatory element annotations were determined based on 25-state models from the Roadmap Epigenomics Project. ASoC SNPs were assigned to eQTL genes and DE genes based on significant variant-gene pairs (GTEx V8) and positions (25 kbp up/downstream of ASoC SNPs), respectively. Numbers at the top of each bar indicate the exact number of ASoC SNPs belonging to the annotation or the gene group.

(C) Bar plot showing the enrichment of ASoCs assigned to our DE-Gs. The x axis represents cell types, and the y axis represents odds ratio that ASoCs are assigned to the DE-Gs (i.e., ASoC SNP is located in the promoter of the DEG). Color indicates disease conditions: red for hospitalized COVID-19 and blue for convalescent COVID-19. The numbers on the bar are FDR-adjusted p values and number of ASoC SNPs assigned to DEG out of the number of ASoC SNPs identified for the cell type.

(D) Heatmap of correlations between allelic imbalance and TF motif disruption. For each ASoC SNP, the allelic imbalance was represented by  $\log_2(\text{reference read counts}/\text{alternative read counts})$ , while the motif disruption was the difference between altScore and refScore by motifbreakR. Colors of the heatmap are Spearman's rho, and multiplication symbols (x) indicate significant correlations (FDR-adjusted  $p < 0.05$ ).

(legend continued on next page)

Given that the genetic variants can perturb TF binding affinities by breaking the corresponding TF motifs, resulting in dysregulation of target genes,<sup>29</sup> we calculated motif disruption scores (MDSs) for each ASoC SNP.<sup>30</sup> We found that the allelic chromatin accessibilities were significantly correlated with MDSs for several TF motifs in classical monocytes from hospitalized COVID-19 patients (Spearman's rank rho, FDR-adjusted  $p < 0.05$ ; Figure 5D), suggesting that ASoC SNPs can play regulatory roles by disrupting TF motifs (i.e., affecting TF binding affinities).

### ASoC of COVID-19 GWAS variants

Next, we intersected our ASoC SNPs with the above-mentioned COVID-19 GWAS hospitalization risk variants.<sup>14</sup> We found that ASoC SNPs identified in classical monocytes from hospitalized COVID-19 patients were also associated with COVID-19, compared with randomly selected SNPs with matched minor allele frequency (Figures 5E and S10G). Among them, rs6800484 (COVID-19 GWAS  $p = 6.58 \times 10^{-9}$ ) showed an imbalance of chromatin accessibility in classical monocytes in hospitalized COVID-19 patients (binomial test,  $p < 0.05$ ), but not in convalescent individuals (Figure 5F). Of note, this SNP is located in a classical monocyte-specific open chromatin peak that was annotated as an EnhA1 enhancer (Roadmap Epigenomics Project)<sup>31</sup> close to the *CCR* gene family.

This observation led us to further explore this locus by combining our results (ASoC SNPs, scRNA-seq, and scATAC-seq) with publicly available data, including promoter capture Hi-C of monocytes (PCHiCs),<sup>32</sup> eQTL of whole-blood samples,<sup>33</sup> and COVID-19 GWAS summary statistics.<sup>14</sup> As shown in Figure 5G, we illustrated a potential regulatory program showing the effect of this variant underlying the COVID-19 context. Specifically, the publicly available monocyte PCHiC data and our peak-to-gene linkage analysis (see STAR Methods) suggest that the expression of *CCR2* is correlated with the regulatory elements pinpointed by rs6800484 in classical monocytes from hospitalized COVID-19 patients. In addition, rs6800484-C is significantly associated with both COVID-19 ( $p = 6.58 \times 10^{-9}$ ) and decreased *CCR2* expression ( $p = 4.29 \times 10^{-13}$ ). Meanwhile, in classical monocytes, homozygous risk allele (C/C) carriers show significantly lower *CCR2* levels compared with other COVID-19 patients (Wilcoxon test, Bonferroni-corrected  $p = 3.2 \times 10^{-3}$ ; Figure S10H), validating the inhibiting role of the risk allele on *CCR2* expression.

As summarized in Figure 5H, the COVID-19 risk allele rs6800484-C identified in hospitalized patients is associated with decreased chromatin accessibility of an enhancer at the locus, which further inhibits the *CCR2* expression. Of note, a recent study using a mouse-adapted SARS-CoV-2 strain has shown that mice lacking *Ccr2* demonstrate higher viral loads

and increased lung viral dissemination.<sup>34</sup> In addition, our scRNA-seq data of classical monocytes confirms the importance of *CCR2* because it was significantly upregulated in classical monocytes both in hospitalized COVID-19 patients (compared with convalescent ones, Bonferroni-corrected  $p < 2.22 \times 10^{-16}$ ) and the disease-related R4 sub-cluster (compared with other monocyte sub-clusters, Bonferroni-corrected  $p < 2.22 \times 10^{-16}$ ). In the public BAL samples from COVID-19 patients,<sup>25</sup> *CCR2* was also highly expressed in the infiltrating monocytes that would later differentiate toward macrophages (Figure 5I).

Another interesting example of potential regulation programs for *DPP9*, a candidate gene for COVID-19 severity, is depicted in Figures S10I–S10K. The *DPP9* gene harbors SNPs associated with COVID-19 ( $p < 5 \times 10^{-8}$ ) and was prioritized as a candidate gene that is involved in host-driven inflammatory lung injury in severe patients.<sup>13</sup> Also, this locus has been previously reported to be associated with fibrotic idiopathic interstitial pneumonias,<sup>35</sup> which suggests the potential role of dipeptidylpeptidase 9 (the enzyme encoded by *DPP9*) in severe COVID-19 patients. Moreover, early studies reported the enzyme is involved in antiviral signaling pathways,<sup>36</sup> antigen presentation,<sup>37</sup> and the activation of inflammasome.<sup>38</sup> Taken together, these data depict an epigenetic regulation effect of risk allele of *DPP9* locus in severe COVID-19 patients.

### DISCUSSION

Both host response and genetic predisposition affect the course and outcome of COVID-19, although the interplay between the two is not yet fully understood. Our single-cell multi-omics study has revealed numerous insights into the (epi)genetic mechanisms that regulate immune cells in COVID-19. First, we observed that COVID-19 has a pronounced effect on the transcriptional signature of classical monocytes, which was shown to be epigenetically regulated, and that the difference between mild and severe COVID-19 is due to a difference in the magnitude of response rather than differing transcriptional programs. Second, we depicted the regulatory properties of the long noncoding RNA *LUCAT1* on the G/EBPs TFs, linking it to COVID-19 severity, and we experimentally validated the regulatory relationships. Finally, we identified a number of ASoC SNPs with potential regulatory effects in hospitalized COVID-19 patients. Interestingly, among these ASoC SNPs, rs6800484-C was associated with COVID-19 risk and linked to decreased chromatin accessibility, as well as reduced expression of *CCR2*, specifically in classical monocytes from hospitalized COVID-19 patients. Together, these findings shed light on the genetic, epigenetic, and transcriptional regulation of immune cells in COVID-19 (Figure 6).

(E) Q-Q plot of COVID-19 GWAS p values for identified ASoC SNPs. The y axis represents observed GWAS p values (converted by  $-\log_{10}$ ) of ASoC SNPs in cMono of hospitalized (red), convalescent COVID-19 (green) participants, and random selected SNPs (blue) with matched minor allele frequency.

(F) Allelic reads depth of ASoC SNP rs6800484 at the COVID-19-related *CCR* locus.

(G) Integration of gene-to-peak link, single-cell ATAC-seq, promoter capture Hi-C, eQTL SNPs, and COVID-19 GWAS SNPs around ASoC SNP rs6800484.

(H) Schematic plot showing the potential epigenetic and genetic regulating program at *CCR2* locus under COVID-19 scenario.

(I) *CCR2* expression in the differentiation trajectory of monocytes and macrophages of BAL fluid samples of COVID-19 patients (Wendisch et al.<sup>25</sup>).

<NA>, no valid estimation available. See also Figure S10.

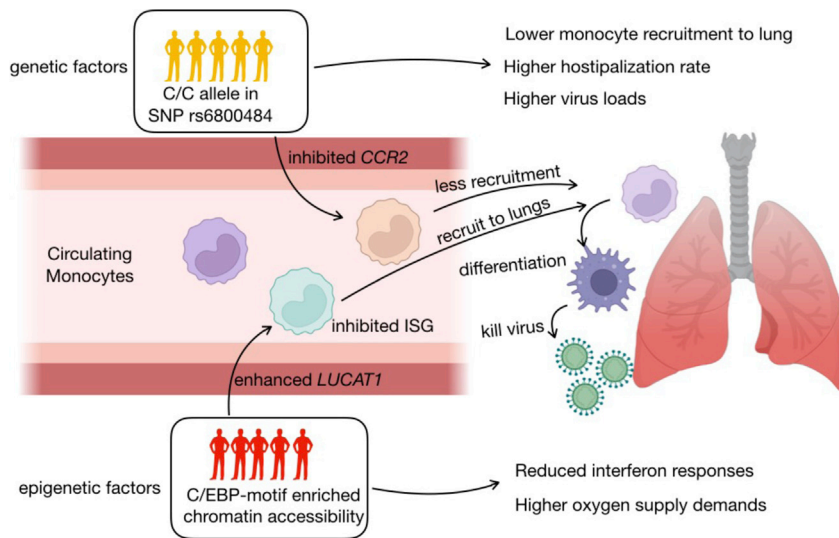

**Figure 6. Schematic plot summarizing the genetic and epigenetic dysregulation of innate immunity in COVID-19**

In our study, we observed a number of changes in cell proportions between hospitalized and convalescent COVID-19 patients, but fewer between severe and mild patients. Lymphopenia has been linked to COVID-19, as is also observed in our data, with hospitalized COVID-19 patients having a lower percentage of CD4<sup>+</sup> T cells. We also saw an increased proportion of classical monocytes in hospitalized COVID-19 patients, as also observed earlier.<sup>7</sup> In addition, we observed an upregulation of type I IFN signaling, which is crucial for antiviral immunity, in various monocyte subsets in COVID-19 patients compared with recovered individuals, e.g., *IFI27*, *ISG15*, and *IFI6*, which was also observed earlier in monocytes from COVID-19 patients compared with healthy controls.<sup>7</sup> Interestingly, most of the observed differences were shared between mild and severe COVID-19 patients compared with convalescent individuals. This suggests that the difference in immunity between mild and severe COVID-19 is a matter of degree rather than reflecting distinct transcriptional profiles. This is in line with a previous observation that there are no immunological endotypes within the spectrum of COVID-19<sup>39</sup> like those seen, for example, in sepsis.<sup>40</sup>

With open chromatin profiles, we observed enrichment of *C/EBP*, *JUN*, *FOS*, and *SPI1* motifs in classical monocytes, which are also reported as critical TFs to monocyte development in sepsis.<sup>23</sup> Because a subgroup of severe COVID-19 patients also developed a sepsis-like syndrome,<sup>40–42</sup> there could be some overlapping immune-regulatory mechanisms at play. Examining co-expression of genes and peak-to-gene linkages, we found that the long noncoding RNA *LUCAT1* interacts with all these *SPI1*, *JUN*, *FOS*, *CEBPD*, and *CEBPE* TFs. We applied knockout and inhibitor experiments to decode the regulatory and feedback mechanism among these molecules. The sub-clustering of monocytes further illustrated C/EBP motif-enriched classical monocyte subsets specific to hospitalized COVID-19 patients. These results together led us to envision a dysregulated cascade where increased C/EBP regulation enhanced *LUCAT1* expression and further suppressed IFN responses to SARS-CoV-2 infection, which finally led to dysfunctional immune responses of COVID-19. Activation of C/EBP TFs was also reported to license the differ-

entiation of profibrotic macrophages and trigger lung fibrosis in COVID-19.<sup>25</sup> In our study, we observed the enrichment of open chromatin regions with C/EBP motifs in an oxygen-supply-associated monocyte sub-cluster, suggesting the activation of C/EBP regulation programs in circulating monocytes may also be associated with lung fibrosis and contribute to the need for oxygen in COVID-19 patients.

Finally, we identified ASoC SNPs in regulatory elements that potentially disrupt regulation and consequently affect gene expression.<sup>43,44</sup> Of note, we observed that the

COVID-19 risk allele rs6800484-C corresponds to lower chromatin accessibility and lower expression of *CCR2* in classical monocytes,<sup>13</sup> suggesting the potential genetic and epigenetic regulatory function of rs6800484 in COVID-19 patients. The *CCR2* gene encodes the chemokine receptor for monocyte chemoattractant protein-1 (MCP-1/CCL2), which promotes the migration of monocytes to sites of inflammation.<sup>45,46</sup> MCP-1/CCL2 was reported to be enriched in BAL samples collected from severe COVID-19 patients, indicating active recruitment of CCR2<sup>+</sup> monocytes and high inflammation in lung tissues.<sup>47</sup> This suggests that the ASoC in the observed variant may impact monocyte recruitment to tissue by reducing *CCR2* expression and thereby further influence the innate immune responses in COVID-19 patients. Although the down-regulation of *CCR2* expression corresponds to higher viral loads and increased viral dissemination in animal models,<sup>34</sup> we observed a significant down-regulation of *CCR2* expression only in patients with C/C alleles compared with others, but not in the comparisons between hospitalized/severe COVID-19 patients and convalescent.

In summary, our data have improved the understanding of the genetic and transcriptional regulation of dysregulated immune responses in COVID-19 and identified *LUCAT1* and *CCR2* as key regulators of detrimental immunity. Both factors contribute to COVID-19 pathogenesis in a subset of patients, while the co-action of these factors could bring heterogeneous responses to the SARS-CoV-2 infection. These leads can be used as a starting point for the development of personalized host-directed therapy to treat COVID-19.

#### Limitations of the study

Despite our interesting findings, this study also has several limitations. First, we focused our analysis to monocytes in peripheral blood. This choice was motivated by an over-representation of significant differences in the myeloid cell compartment, which also corresponds to our previous results.<sup>4</sup> Although our data provided limited observations in lymphocytes, the importance of their role in the immune response in COVID-19 should not be ignored. Considering the large diversity and complexity of

T cell populations, it will be interesting to dissect the T cell subsets in COVID-19 through T cell enrichment combined with T cell receptor sequencing in future studies. Second, although we used computational methods to link cells across scRNA-seq and scATAC-seq, the sequencing libraries of the two platforms were constructed independently. Therefore, we were unable to simultaneously profile gene expression and open chromatin from the same cell, which limited our power to characterize the full regulatory programs for different cells. Finally, our ASoC analyses were limited by the number of heterozygous SNPs among our participants. A future study based on a large cohort or a cohort pre-selected to have heterozygous alleles along the COVID-19 GWAS risk variants would address the full picture of genetic regulators of immune responses in COVID-19.

## STAR★METHODS

Detailed methods are provided in the online version of this paper and include the following:

- **KEY RESOURCES TABLE**
- **RESOURCE AVAILABILITY**
  - Lead contact
  - Materials availability
  - Data and code availability
- **EXPERIMENTAL MODEL AND SUBJECT DETAILS**
- **METHOD DETAILS**
  - Single-cell RNA-seq library preparation and sequencing
  - Single-cell ATAC-seq library preparation and sequencing
  - Genotyping
- **QUANTIFICATION AND STATISTICAL ANALYSIS**
  - Genotype imputation
  - Data pre-processing and demultiplex of 10x genomics Chromium scRNA-seq data
  - Data pre-processing and demultiplex of 10x genomics Chromium scATAC-seq data
  - Independent sample set
  - QC for scRNA-seq data
  - Dimensionality reduction and clustering for scRNA-seq data
  - Annotation of scRNA-seq clusters
  - DE-Gs across Covid-19 conditions
  - QC for scATAC-seq data
  - Dimensionality reduction and clustering for scATAC-seq data
  - Annotation of scATAC-seq clusters
  - Peaks calling and marker peaks detection
  - TF motif annotation and enrichment
  - Cross-platform linkage of scATAC-seq data with scRNA-seq data
  - Peak-to-gene linkage
  - TF footprinting with scATAC-seq data
  - Sub-clustering of monocyte compartments in scRNA-seq
  - Sub-clustering of monocyte compartments in scATAC-seq

- TF gene expression and regulon enrichment analysis
- Chromatin accessibility of COVID-19 risk variants
- Identification of ASoC SNPs
- Annotation and function enrichment of ASoC SNPs
- Correlation between allelic imbalance and motif disruptions
- Multi-omics integration from the public resource and the current study
- CRISPR- and inhibitor-experiments

## SUPPLEMENTAL INFORMATION

Supplemental information can be found online at <https://doi.org/10.1016/j.xgen.2022.100232>.

## ACKNOWLEDGMENTS

The authors thank all volunteers from the Hannover Medical School (MHH) for participation in the study. This study was supported by the COFONI (COVID-19 Research Network of the State of Lower Saxony) with funding from the Ministry of Science and Culture of Lower Saxony, Germany (14-76403-184) to Y.L., R.F., T.I., and J.H.; the Network Universities of Medicine (NUM) CODEX+ fund from the Federal Ministry of Education and Research (BMBF) to Y.L.; the Deutsche Forschungsgemeinschaft (DFG; German Research Foundation) under Germany's Excellence Strategy—EXC 2155 project number 390874280 to Y.L.; and the Helmholtz Centre for Infection Research network fund (NASAVIR) to Y.L. and J.H. Y.L. was also supported by a European Research Council (ERC) Starting Grant (948207) and the Radboud University Medical Center Hypatia Grant (2018) for Scientific Research. Z.Z. was supported by a joint scholarship by the University of Groningen and China Scholarship Consortium (CSC201706350277) and Singh-Chhatwal Postdoctoral Fellowship at the Helmholtz Centre for Infection Research. The Genotype-Tissue Expression (GTEx) Project was supported by the Common Fund of the Office of the Director of the National Institutes of Health and by the National Cancer Institute (NCI), National Human Genome Research Institute (NHGRI), National Heart, Lung, and Blood Institute (NHLBI), National Institute on Drug Abuse (NIDA), National Institute of Mental Health (NIMH), and National Institute of Neurological Disorders and Stroke (NINDS). The data used for the analyses described in this manuscript were obtained from the GTEx Portal on May 28, 2021. A.-E.S. acknowledges FOR-COVID (Bayerisches Staatsministerium für Wissenschaft und Kunst) and the Helmholtz Association for support.

## AUTHOR CONTRIBUTIONS

Conceptualization and study design: Y.L.; data analysis and investigation: B.Z., Z.Z., V.A.C.M.K., S.K., A.V., and R.G.; loss-of-function experiments: L.N.S.; discussion and interpretation: B.Z., Z.Z., V.A.C.M.K., Y.L., C.-J.X., S.K., M.C., L.N.S., L.E.S., A.V., U.O., and J.H.; sample collection and biospecimen resources: M.C., L.N.S., R.F., T.I., U.O., H.-C.T., Z.L., C.F.S., B.B., and R.G.; writing – original manuscript: B.Z., Z.Z., and V.A.C.M.K.; review and editing manuscript: all authors.

## DECLARATION OF INTERESTS

The authors declare no competing interests.

## INCLUSION AND DIVERSITY

We support inclusive, diverse, and equitable conduct of research.

Received: May 31, 2022  
Revised: October 21, 2022  
Accepted: November 17, 2022  
Published: December 1, 2022

REFERENCES

- Wu, F., Zhao, S., Yu, B., Chen, Y.-M., Wang, W., Song, Z.-G., Hu, Y., Tao, Z.-W., Tian, J.-H., Pei, Y.-Y., et al. (2020). A new coronavirus associated with human respiratory disease in China. *Nature* 579, 265–269. <https://doi.org/10.1038/s41586-020-2008-3>.
- Verity, R., Okell, L.C., Dorigatti, I., Winskill, P., Whittaker, C., Imai, N., Cuomo-Dannenburg, G., Thompson, H., Walker, P.G.T., Fu, H., et al. (2020). Estimates of the severity of coronavirus disease 2019: a model-based analysis. *Lancet Infect. Dis.* 20, 669–677. [https://doi.org/10.1016/S1473-3099\(20\)30243-7](https://doi.org/10.1016/S1473-3099(20)30243-7).
- Polack, F.P., Thomas, S.J., Kitchin, N., Absalon, J., Gurtman, A., Lockhart, S., Perez, J.L., Pérez Marc, G., Moreira, E.D., Zerbini, C., et al. (2020). Safety and efficacy of the BNT162b2 mRNA covid-19 vaccine. *N. Engl. J. Med.* 383, 2603–2615. <https://doi.org/10.1056/NEJMoa2034577>.
- Schulte-Schrepping, J., Reusch, N., Paclik, D., Baßler, K., Schlickeiser, S., Zhang, B., Krämer, B., Krammer, T., Brumhard, S., Bonaguro, L., et al. (2020). Severe COVID-19 is marked by a dysregulated myeloid cell compartment. *Cell* 182, 1419–1440.e23. <https://doi.org/10.1016/j.cell.2020.08.001>.
- Ren, X., Wen, W., Fan, X., Hou, W., Su, B., Cai, P., Li, J., Liu, Y., Tang, F., Zhang, F., et al. (2021). COVID-19 immune features revealed by a large-scale single-cell transcriptome atlas. *Cell* 184, 1895–1913.e19. <https://doi.org/10.1016/j.cell.2021.01.053>.
- Chen, G., Wu, D., Guo, W., Cao, Y., Huang, D., Wang, H., Wang, T., Zhang, X., Chen, H., Yu, H., et al. (2020). Clinical and immunological features of severe and moderate coronavirus disease 2019. *J. Clin. Invest.* 130, 2620–2629. <https://doi.org/10.1172/JCI137244>.
- Zhang, J.-Y., Wang, X.-M., Xing, X., Xu, Z., Zhang, C., Song, J.-W., Fan, X., Xia, P., Fu, J.-L., Wang, S.-Y., et al. (2020). Single-cell landscape of immunological responses in patients with COVID-19. *Nat. Immunol.* 21, 1107–1118. <https://doi.org/10.1038/s41590-020-0762-x>.
- Chen, Z., and John Wherry, E. (2020). T cell responses in patients with COVID-19. *Nat. Rev. Immunol.* 20, 529–536. <https://doi.org/10.1038/s41577-020-0402-6>.
- Reusch, N., De Domenico, E., Bonaguro, L., Schulte-Schrepping, J., Baßler, K., Schultze, J.L., and Aschenbrenner, A.C. (2021). Neutrophils in COVID-19. *Front. Immunol.* 12, 652470. <https://doi.org/10.3389/fimmu.2021.652470>.
- Krämer, B., Knoll, R., Bonaguro, L., ToVinh, M., Raabe, J., Astaburuaga-García, R., Schulte-Schrepping, J., Kaiser, K.M., Rieke, G.J., Bischoff, J., et al. (2021). Early IFN- $\alpha$  signatures and persistent dysfunction are distinguishing features of NK cells in severe COVID-19. *Immunity* 54, 2650–2669.e14. <https://doi.org/10.1016/j.immuni.2021.09.002>.
- Yang, Q., Lin, F., Wang, Y., Zeng, M., and Luo, M. (2021). Long noncoding RNAs as emerging regulators of COVID-19. *Front. Immunol.* 12, 700184. <https://doi.org/10.3389/fimmu.2021.700184>.
- Severe Covid-19 GWAS Group; Ellinghaus, D., Degenhardt, F., Bujanda, L., Buti, M., Albillos, A., Invernizzi, P., Fernández, J., Prati, D., Baselli, G., et al. (2020). Genomewide association study of severe covid-19 with respiratory failure. *N. Engl. J. Med.* 383, 1522–1534. <https://doi.org/10.1056/NEJMoa2020283>.
- Pairo-Castineira, E., Clohisey, S., Klaric, L., Bretherick, A.D., Rawlik, K., Pasko, D., Walker, S., Parkinson, N., Fourman, M.H., Russell, C.D., et al. (2021). Genetic mechanisms of critical illness in COVID-19. *Nature* 591, 92–98. <https://doi.org/10.1038/s41586-020-03065-y>.
- Callaway, E. (2021). Mapping the human genetic architecture of COVID-19. *Nature* 596, 472–473. <https://doi.org/10.1038/s41586-021-03767-x>.
- You, M., Chen, L., Zhang, D., Zhao, P., Chen, Z., Qin, E.-Q., Gao, Y., Davis, M.M., and Yang, P. (2021). Single-cell epigenomic landscape of peripheral immune cells reveals establishment of trained immunity in individuals convalescing from COVID-19. *Nat. Cell Biol.* 23, 620–630. <https://doi.org/10.1038/s41556-021-00690-1>.
- Liu, Z., Kilic, G., Li, W., Bulut, O., Gupta, M.K., Zhang, B., Qi, C., Peng, H., Tsay, H.-C., Soon, C.F., et al. (2022). Multi-omics integration reveals only minor long-term molecular and functional sequelae in immune cells of individuals recovered from COVID-19. *Front. Immunol.* 13, 838132. <https://doi.org/10.3389/fimmu.2022.838132>.
- Gallagher, M.D., and Chen-Plotkin, A.S. (2018). The post-GWAS era: from association to function. *Am. J. Hum. Genet.* 102, 717–730. <https://doi.org/10.1016/j.ajhg.2018.04.002>.
- Nott, A., Holtman, I.R., Coufal, N.G., Schlachetzki, J.C.M., Yu, M., Hu, R., Han, C.Z., Pena, M., Xiao, J., Wu, Y., et al. (2019). Brain cell type-specific enhancer-promoter interactome maps and disease-risk association. *Science* 366, 1134–1139. <https://doi.org/10.1126/science.aay0793>.
- Corces, M.R., Shcherbina, A., Kundu, S., Gloudemans, M.J., Frésard, L., Granja, J.M., Louie, B.H., Eulalio, T., Shams, S., Bagdatli, S.T., et al. (2020). Single-cell epigenomic analyses implicate candidate causal variants at inherited risk loci for Alzheimer’s and Parkinson’s diseases. *Nat. Genet.* 52, 1158–1168. <https://doi.org/10.1038/s41588-020-00721-x>.
- Chu, X., Zhang, B., Koeken, V.A.C.M., Gupta, M.K., and Li, Y. (2021). Multi-omics approaches in immunological research. *Front. Immunol.* 12, 668045. <https://doi.org/10.3389/fimmu.2021.668045>.
- Patterson, B.K., Francisco, E.B., Yogendra, R., Long, E., Pise, A., Rodrigues, H., Hall, E., Herrera, M., Parikh, P., Guevara-Coto, J., et al. (2021). Persistence of SARS CoV-2 S1 protein in CD16+ monocytes in post-acute sequelae of COVID-19 (PASC) up to 15 Months post-infection. *Immunology* 12, 746021. <https://doi.org/10.1101/2021.06.25.449905>.
- Rosenbauer, F., and Tenen, D.G. (2007). Transcription factors in myeloid development: balancing differentiation with transformation. *Nat. Rev. Immunol.* 7, 105–117. <https://doi.org/10.1038/nri2024>.
- Reyes, M., Filbin, M.R., Bhattacharyya, R.P., Billman, K., Eisenhaure, T., Hung, D.T., Levy, B.D., Baron, R.M., Blainey, P.C., Goldberg, M.B., and Hacohen, N. (2020). An immune-cell signature of bacterial sepsis. *Nat. Med.* 26, 333–340. <https://doi.org/10.1038/s41591-020-0752-4>.
- Agarwal, S., Vierbuchen, T., Ghosh, S., Chan, J., Jiang, Z., Kandasamy, R.K., et al. (2020). The long non-coding RNA LUCAT1 is a negative feedback regulator of interferon responses in humans. *Nat. Commun.* 11, 6348. <https://doi.org/10.1038/s41467-020-20165-5>.
- Wendisch, D., Dietrich, O., Mari, T., von Stillfried, S., Ibarra, I.L., Mittermaier, M., Mache, C., Chua, R.L., Knoll, R., Timm, S., et al. (2021). SARS-CoV-2 infection triggers profibrotic macrophage responses and lung fibrosis. *Cell* 184, 6243–6261.e27. <https://doi.org/10.1016/j.cell.2021.11.033>.
- Charo, I.F., and Ransohoff, R.M. (2006). The many roles of chemokines and chemokine receptors in inflammation. *N. Engl. J. Med.* 354, 610–621. <https://doi.org/10.1056/NEJMra052723>.
- Aibar, S., González-Blas, C.B., Moerman, T., Huynh-Thu, V.A., Imrichova, H., Hulselmans, G., Rambow, F., Marine, J.-C., Geurts, P., Aerts, J., et al. (2017). SCENIC: single-cell regulatory network inference and clustering. *Nat. Methods* 14, 1083–1086. <https://doi.org/10.1038/nmeth.4463>.
- GTEx Consortium; Laboratory, Data Analysis & Coordinating Center LDACC—Analysis Working Group; Statistical Methods groups—Analysis Working Group; Enhancing GTEx eGTEx groups; NIH Common Fund; NIH/NCI; NIH/NHGRI; NIH/NIMH; NIH/NIDA; Biospecimen Collection Source Site—NDRI (2017). Genetic effects on gene expression across human tissues. *Nature* 550, 204–213. <https://doi.org/10.1038/nature24277>.
- Abramov, S., Boytsov, A., Bykova, D., Penzar, D.D., Yevshin, I., Kolmykov, S.K., Fridman, M.V., Favorov, A.V., Vorontsov, I.E., Baulin, E., et al. (2021). Landscape of allele-specific transcription factor binding in the human genome. *Nat. Commun.* 12, 2751. <https://doi.org/10.1038/s41467-021-23007-0>.
- Coetzee, S.G., Coetzee, G.A., and Hazelett, D.J. (2015). *motifbreakR* : an R/Bioconductor package for predicting variant effects at transcription factor binding sites: fig. 1. *Bioinformatics* 31, 3847–3849. <https://doi.org/10.1093/bioinformatics/btv470>.

31. Bernstein, B.E., Stamatoyannopoulos, J.A., Costello, J.F., Ren, B., Milosavljevic, A., Meissner, A., Kellis, M., Marra, M.A., Beaudet, A.L., Ecker, J.R., et al. (2010). The NIH Roadmap epigenomics mapping Consortium. *Nat. Biotechnol.* 28, 1045–1048. <https://doi.org/10.1038/nbt1010-1045>.
32. Javierre, B.M., Burren, O.S., Wilder, S.P., Kreuzhuber, R., Hill, S.M., Sewitz, S., Cairns, J., Wingett, S.W., Várnai, C., Thiecke, M.J., et al. (2016). Lineage-specific genome architecture links enhancers and non-coding disease variants to target gene promoters. *Cell* 167, 1369–1384.e19. <https://doi.org/10.1016/j.cell.2016.09.037>.
33. Vösa, U., Claringbould, A., Westra, H.-J., Bonder, M.J., Deelen, P., Zeng, B., Kirsten, H., Saha, A., Kreuzhuber, R., Yazar, S., et al. (2021). Large-scale cis- and trans-eQTL analyses identify thousands of genetic loci and polygenic scores that regulate blood gene expression. *Nat. Genet.* 53, 1300–1310. <https://doi.org/10.1038/s41588-021-00913-z>.
34. Vanderheiden, A., Thomas, J., Soung, A.L., Davis-Gardner, M.E., Floyd, K., Jin, F., Cowan, D.A., Pellegrini, K., Shi, P.Y., Grakoui, A., et al. (2021). CCR2 signaling restricts SARS-CoV-2 infection. *mBio* 12, e0274921-21. <https://doi.org/10.1128/mBio.02749-21>.
35. Fingerlin, T.E., Murphy, E., Zhang, W., Peljto, A.L., Brown, K.K., Steele, M.P., Loyd, J.E., Cosgrove, G.P., Lynch, D., Groshong, S., et al. (2013). Genome-wide association study identifies multiple susceptibility loci for pulmonary fibrosis. *Nat. Genet.* 45, 613–620. <https://doi.org/10.1038/ng.2609>.
36. Zhang, H., Maqsudi, S., Rainczuk, A., Duffield, N., Lawrence, J., Keane, F.M., Justa-Schuch, D., Geiss-Friedlander, R., Gorrell, M.D., and Stephens, A.N. (2015). Identification of novel dipeptidyl peptidase 9 substrates by two-dimensional differential in-gel electrophoresis. *FEBS J.* 282, 3737–3757. <https://doi.org/10.1111/febs.13371>.
37. Geiss-Friedlander, R., Parmentier, N., Möller, U., Urlaub, H., Van den Eynde, B.J., and Melchior, F. (2009). The cytoplasmic peptidase DPP9 is rate-limiting for degradation of proline-containing peptides. *J. Biol. Chem.* 284, 27211–27219. <https://doi.org/10.1074/jbc.M109.041871>.
38. Griswold, A.R., Ball, D.P., Bhattacharjee, A., Chui, A.J., Rao, S.D., Taabazuig, C.Y., and Bachovchin, D.A. (2019). DPP9's enzymatic activity and not its binding to CARD8 inhibits inflammasome activation. *ACS Chem. Biol.* 14, 2424–2429. <https://doi.org/10.1021/acscchembio.9b00462>.
39. Janssen, N.A.F., Grondman, I., de Nooijer, A.H., Boahen, C.K., Koeken, V.A.C.M., Matzaraki, V., Kumar, V., He, X., Kox, M., Koenen, H.J.P.M., et al. (2021). Dysregulated innate and adaptive immune responses discriminate disease severity in COVID-19. *J. Infect. Dis.* 223, 1322–1333. <https://doi.org/10.1093/infdis/jiab065>.
40. Reyes, M., Filbin, M.R., Bhattacharyya, R.P., Sonny, A., Mehta, A., Billman, K., Kays, K.R., Pinilla-Vera, M., Benson, M.E., Cosimi, L.A., et al. (2021). Plasma from patients with bacterial sepsis or severe COVID-19 induces suppressive myeloid cell production from hematopoietic progenitors in vitro. *Sci. Transl. Med.* 13, eabe9599. <https://doi.org/10.1126/scitranslmed.abe9599>.
41. Adams, T.S., Schupp, J.C., Poli, S., Ayaub, E.A., Neumark, N., Ahangari, F., Chu, S.G., Raby, B.A., Deluili, G., Januszky, M., et al. (2020). Single-cell RNA-seq reveals ectopic and aberrant lung-resident cell populations in idiopathic pulmonary fibrosis. *Sci. Adv.* 6, eaba1983. <https://doi.org/10.1126/sciadv.aba1983>.
42. Webb, B.J., Peltan, I.D., Jensen, P., Hoda, D., Hunter, B., Silver, A., Starr, N., Buckel, W., Grisel, N., Hummel, E., et al. (2020). Clinical criteria for COVID-19-associated hyperinflammatory syndrome: a cohort study. *Lancet. Rheumatol.* 2, e754–e763. [https://doi.org/10.1016/S2665-9913\(20\)30343-X](https://doi.org/10.1016/S2665-9913(20)30343-X).
43. Zhang, S., Zhang, H., Zhou, Y., Qiao, M., Zhao, S., Kozlova, A., Shi, J., Sanders, A.R., Wang, G., Luo, K., et al. (2020). Allele-specific open chromatin in human iPSC neurons elucidates functional disease variants. *Science* 369, 561–565. <https://doi.org/10.1126/science.aay3983>.
44. Atak, Z.K., Taskiran, I.I., Demeulemeester, J., Flerin, C., Mauduit, D., Minnoye, L., Hulselmans, G., Christiaens, V., Ghanem, G.-E., Wouters, J., and Aerts, S. (2021). Interpretation of allele-specific chromatin accessibility using cell state-aware deep learning. *Genome Res.* 31, 1082–1096. <https://doi.org/10.1101/gr.260851.120>.
45. Ginhoux, F., and Jung, S. (2014). Monocytes and macrophages: developmental pathways and tissue homeostasis. *Nat. Rev. Immunol.* 14, 392–404. <https://doi.org/10.1038/nri3671>.
46. Serbina, N.V., and Pamer, E.G. (2006). Monocyte emigration from bone marrow during bacterial infection requires signals mediated by chemokine receptor CCR2. *Nat. Immunol.* 7, 311–317. <https://doi.org/10.1038/ni1309>.
47. Zhou, Z., Ren, L., Zhang, L., Zhong, J., Xiao, Y., Jia, Z., Guo, L., Yang, J., Wang, C., Jiang, S., et al. (2020). Heightened innate immune responses in the respiratory tract of COVID-19 patients. *Cell Host Microbe* 27, 883–890.e2. <https://doi.org/10.1016/j.chom.2020.04.017>.
48. Schneider, V.A., Graves-Lindsay, T., Howe, K., Bouk, N., Chen, H.-C., Kitts, P.A., Murphy, T.D., Pruitt, K.D., Thibaud-Nissen, F., Albracht, D., et al. (2017). Evaluation of GRCh38 and de novo haploid genome assemblies demonstrates the enduring quality of the reference assembly. *Genome Res.* 27, 849–864. <https://doi.org/10.1101/gr.213611.116>.
49. Chang, C.C., Chow, C.C., Tellier, L.C., Vattikuti, S., Purcell, S.M., and Lee, J.J. (2015). Second-generation PLINK: rising to the challenge of larger and richer datasets. *GigaScience* 4, 7. <https://doi.org/10.1186/s13742-015-0047-8>.
50. Stuart, T., Butler, A., Hoffman, P., Hafemeister, C., Papalexi, E., Mauck, W.M., Hao, Y., Stoeckius, M., Smibert, P., and Satija, R. (2019). Comprehensive integration of single-cell data. *Cell* 177, 1888–1902.e21. <https://doi.org/10.1016/j.cell.2019.05.031>.
51. Granja, J.M., Corces, M.R., Pierce, S.E., Bagdatli, S.T., Choudhry, H., Chang, H.Y., and Greenleaf, W.J. (2021). ArchR is a scalable software package for integrative single-cell chromatin accessibility analysis. *Nat. Genet.* 53, 403–411. <https://doi.org/10.1038/s41588-021-00790-6>.
52. Wickham, H., Averick, M., Bryan, J., Chang, W., McGowan, L., François, R., Grolemund, G., Hayes, A., Henry, L., Hester, J., et al. (2019). Welcome to the tidyverse. *J. Open Source Softw.* 4, 1686. <https://doi.org/10.21105/joss.01686>.
53. Gentleman, R.C., Carey, V.J., Bates, D.M., Bolstad, B., Dettling, M., Duodoit, S., Ellis, B., Gautier, L., Ge, Y., Gentry, J., et al. (2004). Bioconductor: Open Software Development for Computational Biology and Bioinformatics.
54. Yu, G., Wang, L.-G., Han, Y., and He, Q.-Y. (2012). clusterProfiler: an R Package for comparing biological themes among gene clusters. *OMICS A J. Integr. Biol.* 16, 284–287. <https://doi.org/10.1089/omi.2011.0118>.
55. Carlson, M. (2017). org.Hs.gd.db: Genome Wide Annotation for Human, R package version 3.12.0. <https://doi.org/10.18129/B9.BIOC.ORG.HS.EG.DB>.
56. Slowikowski, K., Schep, A., Hughes, S., Dang, T.K., Lukauskas, S., Irsson, J.-O., Kamvar, Z.N., Thompson, R., Christophe, D., Hiroaki, Y., et al. (2020). R package ggrepel version 0.9.0 (CRAN).
57. Dowle, M., Srinivasan, A., Gorecki, J., Chirico, M., Stetsenko, P., Short, T., Lianoglou, S., Antonyan, E., Bonsch, M., Parsonage, H., et al. (2021). R package data.table version 1.14.0 (CRAN).
58. Harmston, N., Ing-Simmons, E., Perry, M., Baresić, A., and Lenhard, B. (2015). GenomicInteractions: an R/Bioconductor package for manipulating and investigating chromatin interaction data. *BMC Genom.* 16, 963. <https://doi.org/10.1186/s12864-015-2140-x>.
59. Hahne, F., and Ivanek, R. (2016). Visualizing genomic data using Gviz and bioconductor. In *Statistical Genomics Methods in Molecular Biology*, E. Mathé and S. Davis, eds. (Springer New York), pp. 335–351. [https://doi.org/10.1007/978-1-4939-3578-9\\_16](https://doi.org/10.1007/978-1-4939-3578-9_16).
60. Van Rossum, G. (2009). Python version 3.9.6. (Python Software Foundation).
61. Gaspar, J.M. (2018). Improved peak-calling with MACS2. *Bioinformatics*. <https://doi.org/10.1101/496521>.

62. Langmead, B., and Salzberg, S.L. (2012). Fast gapped-read alignment with Bowtie 2. *Nat. Methods* 9, 357–359. <https://doi.org/10.1038/nmeth.1923>.
63. Hunter, J.D. (2007). Matplotlib: A 2D Graphics Environment. *Computing in Science & Engineering* 9, 90–95.
64. Danecek, P., Bonfield, J.K., Liddle, J., Marshall, J., Ohan, V., Pollard, M.O., Whitwham, A., Keane, T., McCarthy, S.A., Davies, R.M., and Li, H. (2021). Twelve years of SAMtools and BCFtools. *GigaScience* 10, giab008. <https://doi.org/10.1093/gigascience/giab008>.
65. van de Geijn, B., McVicker, G., Gilad, Y., and Pritchard, J.K. (2015). WASP: allele-specific software for robust molecular quantitative trait locus discovery. *Nat. Methods* 12, 1061–1063. <https://doi.org/10.1038/nmeth.3582>.
66. Castel, S.E., Levy-Moonshine, A., Mohammadi, P., Banks, E., and Lappalainen, T. (2015). Tools and best practices for data processing in allelic expression analysis. *Genome Biol.* 16, 195. <https://doi.org/10.1186/s13059-015-0762-6>.
67. McLaren, W., Gil, L., Hunt, S.E., Riat, H.S., Ritchie, G.R.S., Thormann, A., Flicek, P., and Cunningham, F. (2016). The ensembl variant effect predictor. *Genome Biol.* 17, 122. <https://doi.org/10.1186/s13059-016-0974-4>.
68. Fuchsberger, C., Abecasis, G.R., and Hinds, D.A. (2015). minimac2: faster genotype imputation. *Bioinformatics* 31, 782–784. <https://doi.org/10.1093/bioinformatics/btu704>.
69. NHLBI Trans-Omics for Precision Medicine; TOPMed Consortium; Taliun, D., Harris, D.N., Kessler, M.D., Szpiech, Z.A., Torres, R., Taliun, S.A.G., Corvelo, A., Gogarten, S.M., Kang, H.M., Pitsillides, A.N., et al. (2021). Sequencing of 53, 831 diverse genomes from the NHLBI TOPMed Program. *Nature* 590, 290–299. <https://doi.org/10.1038/s41586-021-03205-y>.
70. Das, S., Forer, L., Schönherr, S., Sidore, C., Locke, A.E., Kwong, A., Vrieze, S.I., Chew, E.Y., Levy, S., McGue, M., et al. (2016). Next-generation genotype imputation service and methods. *Nat. Genet.* 48, 1284–1287. <https://doi.org/10.1038/ng.3656>.
71. Purcell, S., Neale, B., Todd-Brown, K., Thomas, L., Ferreira, M.A.R., Bender, D., Maller, J., Sklar, P., de Bakker, P.I.W., Daly, M.J., and Sham, P.C. (2007). PLINK: a tool set for whole-genome association and population-based linkage analyses. *Am. J. Hum. Genet.* 81, 559–575. <https://doi.org/10.1086/519795>.
72. Dobin, A., Davis, C.A., Schlesinger, F., Drenkow, J., Zaleski, C., Jha, S., Batut, P., Chaisson, M., and Gingeras, T.R. (2013). STAR: ultrafast universal RNA-seq aligner. *Bioinformatics* 29, 15–21. <https://doi.org/10.1093/bioinformatics/bts635>.
73. Heaton, H., Talman, A.M., Knights, A., Imaz, M., Gaffney, D.J., Durbin, R., Hemberg, M., and Lawnczak, M.K.N. (2020). SoupORcell: robust clustering of single-cell RNA-seq data by genotype without reference genotypes. *Nat. Methods* 17, 615–620. <https://doi.org/10.1038/s41592-020-0820-1>.
74. Garrison, E., and Marth, G. (2012). Haplotype-based variant detection from short-read sequencing. Preprint at arXiv. <https://doi.org/10.48550/ARXIV.1207.3907>.
75. Aran, D., Looney, A.P., Liu, L., Wu, E., Fong, V., Hsu, A., Chak, S., Naikawadi, R.P., Wolters, P.J., Abate, A.R., et al. (2019). Reference-based analysis of lung single-cell sequencing reveals a transitional profibrotic macrophage. *Nat. Immunol.* 20, 163–172. <https://doi.org/10.1038/s41590-018-0276-y>.
76. Mabbott, N.A., Baillie, J.K., Brown, H., Freeman, T.C., and Hume, D.A. (2013). An expression atlas of human primary cells: inference of gene function from coexpression networks. *BMC Genom.* 14, 632. <https://doi.org/10.1186/1471-2164-14-632>.
77. Martens, J.H.A., and Stunnenberg, H.G. (2013). BLUEPRINT: mapping human blood cell epigenomes. *Haematologica* 98, 1487–1489. <https://doi.org/10.3324/haematol.2013.094243>.
78. ENCODE Project Consortium (2012). An integrated encyclopedia of DNA elements in the human genome. *Nature* 489, 57–74. <https://doi.org/10.1038/nature11247>.
79. Schmiedel, B.J., Singh, D., Madrigal, A., Valdovino-Gonzalez, A.G., White, B.M., Zapardiel-Gonzalo, J., Ha, B., Altay, G., Greenbaum, J.A., McVicker, G., et al. (2018). Impact of genetic polymorphisms on human immune cell gene expression. *Cell* 175, 1701–1715.e16. <https://doi.org/10.1016/j.cell.2018.10.022>.
80. Novershtern, N., Subramanian, A., Lawton, L.N., Mak, R.H., Haining, W.N., McConkey, M.E., Habib, N., Yosef, N., Chang, C.Y., Shay, T., et al. (2011). Densely interconnected transcriptional circuits control cell states in human hematopoiesis. *Cell* 144, 296–309. <https://doi.org/10.1016/j.cell.2011.01.004>.
81. Monaco, G., Lee, B., Xu, W., Mustafah, S., Hwang, Y.Y., Carré, C., Burdin, N., Visan, L., Ceccarelli, M., Poidinger, M., et al. (2019). RNA-seq signatures normalized by mRNA abundance allow absolute deconvolution of human immune cell types. *Cell Rep.* 26, 1627–1640.e7. <https://doi.org/10.1016/j.celrep.2019.01.041>.
82. Finak, G., McDavid, A., Yajima, M., Deng, J., Gersuk, V., Shalek, A.K., Slichter, C.K., Miller, H.W., McElrath, M.J., Pric, M., et al. (2015). MAST: a flexible statistical framework for assessing transcriptional changes and characterizing heterogeneity in single-cell RNA sequencing data. *Genome Biol.* 16, 278. <https://doi.org/10.1186/s13059-015-0844-5>.
83. Zhang, Y., Liu, T., Meyer, C.A., Eeckhoutte, J., Johnson, D.S., Bernstein, B.E., Nusbaum, C., Myers, R.M., Brown, M., Li, W., and Liu, X.S. (2008). Model-based analysis of ChIP-seq (MACS). *Genome Biol.* 9, R137. <https://doi.org/10.1186/gb-2008-9-9-r137>.
84. Weirauch, M.T., Yang, A., Albu, M., Cote, A.G., Montenegro-Montero, A., Drewe, P., Najafabadi, H.S., Lambert, S.A., Mann, I., Cook, K., et al. (2014). Determination and inference of eukaryotic transcription factor sequence specificity. *Cell* 158, 1431–1443. <https://doi.org/10.1016/j.cell.2014.08.009>.
85. Roadmap Epigenomics Consortium; Kundaje, A., Meuleman, W., Ernst, J., Bilenky, M., Yen, A., Heravi-Moussavi, A., Kheradpour, P., Zhang, Z., Wang, J., et al. (2015). Integrative analysis of 111 reference human epigenomes. *Nature* 518, 317–330. <https://doi.org/10.1038/nature14248>.



## STAR★METHODS

### KEY RESOURCES TABLE

| REAGENT or RESOURCE                                       | SOURCE                                                 | IDENTIFIER                                                                                                                                                      |
|-----------------------------------------------------------|--------------------------------------------------------|-----------------------------------------------------------------------------------------------------------------------------------------------------------------|
| <b>Biological samples</b>                                 |                                                        |                                                                                                                                                                 |
| Human peripheral blood mononuclear cell                   | N/A                                                    | N/A                                                                                                                                                             |
| <b>Chemicals, peptides, and recombinant proteins</b>      |                                                        |                                                                                                                                                                 |
| RPMI 1640 Medium                                          | SIGMA                                                  | MDL# R0883-500ML                                                                                                                                                |
| Fetal Bovine Serum                                        | PAN BIOTECH                                            | Cat# P30-5500                                                                                                                                                   |
| Dulbecco'S Phosphate Buffered Saline                      | PAN BIOTECH                                            | Cat# P04-36500                                                                                                                                                  |
| Buffer EB                                                 | QIAGEN                                                 | Cat# 19086                                                                                                                                                      |
| SPRIselect                                                | Beckmann Coulter                                       | Cat# B23318                                                                                                                                                     |
| <b>Critical commercial assays</b>                         |                                                        |                                                                                                                                                                 |
| Chromium Next GEM Single Cell 3'Regent Kits v3.1          | 10X                                                    | CG000315 Rev A                                                                                                                                                  |
| Chromium Next GEM Single Cell ATAC Regent Kits v1.1       | 10X                                                    | CG000209 Rev D                                                                                                                                                  |
| High sensitivity DNA kit                                  | Agilent                                                | Cat# 5067-4626                                                                                                                                                  |
| <b>Deposited data</b>                                     |                                                        |                                                                                                                                                                 |
| Human reference genome NCBI build 38, GRCh38              | Genome Reference Consortium <sup>48</sup>              | <a href="http://www.ncbi.nlm.nih.gov/projects/genome/assembly/grc/human/">http://www.ncbi.nlm.nih.gov/projects/genome/assembly/grc/human/</a>                   |
| Human reference epigenomic annotations                    | Roadmap Epigenomics Consortium <sup>31</sup>           | <a href="https://egg2.wustl.edu/roadmap/web_portal/index.html">https://egg2.wustl.edu/roadmap/web_portal/index.html</a>                                         |
| Bulk RNA-seq eQTL summary statistics (release 2019-12-11) | eQTL-Gen Consortium <sup>33</sup>                      | <a href="https://www.eqtlgen.org">https://www.eqtlgen.org</a>                                                                                                   |
| GTEX eQTL summary statistics (v8)                         | GTEX v8 <sup>28</sup>                                  | <a href="https://www.gtexportal.org/home/datasets">https://www.gtexportal.org/home/datasets</a>                                                                 |
| Promoter capture HiC results                              | Javierre et al. <sup>32</sup>                          | <a href="https://osf.io/u8tzp/">https://osf.io/u8tzp/</a>                                                                                                       |
| COVID-19 GWAS summary statistics (release round 6)        | The COVID-19 Host Genetics initiative <sup>12</sup>    | <a href="https://www.covid19hg.org/results/r6">https://www.covid19hg.org/results/r6</a>                                                                         |
| snRNA-seq data                                            | Wendisch et al. <sup>25</sup>                          | EGAS00001004928; EGAS00001005634; <a href="https://nubes.helmholtz-berlin.de/s/XrM8igTzFTFSoi">https://nubes.helmholtz-berlin.de/s/XrM8igTzFTFSoi</a>           |
| snRNA-seq data                                            | This paper                                             | EGAS00001006559                                                                                                                                                 |
| snATAC-seq data                                           | This paper                                             | EGAS00001006560                                                                                                                                                 |
| Genotypes                                                 | This paper                                             | EGAZ00001823187                                                                                                                                                 |
| <b>Software and algorithms</b>                            |                                                        |                                                                                                                                                                 |
| Plink v1.90b6.21 64-bit (19 Oct 2020)                     | Chang et al. <sup>49</sup>                             | <a href="https://www.cog-genomics.org/plink/">https://www.cog-genomics.org/plink/</a>                                                                           |
| R 4.1                                                     | R Core Team                                            | <a href="https://www.r-project.org/">https://www.r-project.org/</a>                                                                                             |
| R package Seurat version 3.2.2                            | Stuart et al. <sup>50</sup>                            | <a href="https://cran.r-project.org/web/packages/Seurat/index.html">https://cran.r-project.org/web/packages/Seurat/index.html</a>                               |
| R package ArchR version 1.0.1                             | Granja et al. <sup>51</sup>                            | <a href="https://www.archrproject.com/">https://www.archrproject.com/</a>                                                                                       |
| R package ggplot2 version 3.3.2                           | Wickham et al. <sup>52</sup>                           | <a href="https://cran.r-project.org/web/packages/ggplot2/index.html">https://cran.r-project.org/web/packages/ggplot2/index.html</a>                             |
| R package Bioconductor version 3.12                       | Gentleman et al. <sup>53</sup>                         | <a href="https://bioconductor.org">https://bioconductor.org</a>                                                                                                 |
| R package clusterProfiler version 4.0.5                   | Yu et al. <sup>54</sup>                                | <a href="https://bioconductor.org/packages/release/bioc/html/clusterProfiler.html">https://bioconductor.org/packages/release/bioc/html/clusterProfiler.html</a> |
| R package ggpubr version 0.4.0                            | Kassambara, The Comprehensive R Archive Network (CRAN) | <a href="https://cran.r-project.org/web/packages/ggpubr/index.html">https://cran.r-project.org/web/packages/ggpubr/index.html</a>                               |
| R package pheatmap version 1.0.12                         | Raivo, The Comprehensive R Archive Network (CRAN)      | <a href="https://cran.r-project.org/web/packages/pheatmap/index.html">https://cran.r-project.org/web/packages/pheatmap/index.html</a>                           |

(Continued on next page)

**Continued**

| REAGENT or RESOURCE                          | SOURCE                                                                                                                             | IDENTIFIER                                                                                                                                                                                           |
|----------------------------------------------|------------------------------------------------------------------------------------------------------------------------------------|------------------------------------------------------------------------------------------------------------------------------------------------------------------------------------------------------|
| R package tidyverse version 1.3.0            | Wickham et al. <sup>52</sup>                                                                                                       | <a href="https://CRAN.R-project.org/package=tidyverse">https://CRAN.R-project.org/package=tidyverse</a>                                                                                              |
| R package org.Hs.eg.db version 3.12.0        | Carlson <sup>55</sup>                                                                                                              | <a href="https://bioconductor.org/packages/3.12/data/annotation/html/org.Hs.eg.db.html">https://bioconductor.org/packages/3.12/data/annotation/html/org.Hs.eg.db.html</a>                            |
| R package ggrepel version 0.9.0              | Slowikowski <sup>56</sup>                                                                                                          | <a href="https://cran.r-project.org/web/packages/ggrepel/index.html">https://cran.r-project.org/web/packages/ggrepel/index.html</a>                                                                  |
| R package data.table version 1.14.0          | Dowle <sup>57</sup>                                                                                                                | <a href="https://cran.r-project.org/web/packages/data.table/index.html">https://cran.r-project.org/web/packages/data.table/index.html</a>                                                            |
| R package GenomicInteractions version 1.30.0 | Harmston et al. <sup>58</sup>                                                                                                      | <a href="https://bioconductor.org/packages/release/bioc/html/GenomicInteractions.html">https://bioconductor.org/packages/release/bioc/html/GenomicInteractions.html</a>                              |
| R package Gviz version 1.20.1                | Hahne and Ivanek <sup>59</sup>                                                                                                     | <a href="https://bioconductor.org/packages/3.15/bioc/html/Gviz.html">https://bioconductor.org/packages/3.15/bioc/html/Gviz.html</a>                                                                  |
| R package motifbreakR version 2.10.0         | Coetzee, Coetzee, and Hazelett <sup>30</sup>                                                                                       | <a href="https://bioconductor.org/packages/release/bioc/html/motifbreakR.html">https://bioconductor.org/packages/release/bioc/html/motifbreakR.html</a>                                              |
| Python version 3.9.6                         | Van Rossum <sup>60</sup>                                                                                                           | <a href="https://www.python.org">https://www.python.org</a>                                                                                                                                          |
| Python package MACS2 version 2.2.7           | Gaspar <sup>61</sup>                                                                                                               | <a href="https://pypi.org/project/MACS2/">https://pypi.org/project/MACS2/</a>                                                                                                                        |
| Bowtie2 version 2.4.4                        | Langmead and Salzberg <sup>62</sup>                                                                                                | N/A                                                                                                                                                                                                  |
| Python package matplotlib version 3.4        | Hunter <sup>63</sup>                                                                                                               | <a href="https://matplotlib.org">https://matplotlib.org</a>                                                                                                                                          |
| Python package pysam version 0.17.0          | Github pysam-developers                                                                                                            | <a href="https://github.com/pysam-developers/pysam">https://github.com/pysam-developers/pysam</a>                                                                                                    |
| BCFtools version 1.12                        | Danecek et al. <sup>64</sup>                                                                                                       | <a href="http://www.htslib.org">http://www.htslib.org</a>                                                                                                                                            |
| SAMtools version 1.12                        | Danecek et al. <sup>64</sup>                                                                                                       | <a href="http://www.htslib.org">http://www.htslib.org</a>                                                                                                                                            |
| Htslib version 1.12                          | Danecek et al. <sup>64</sup>                                                                                                       | <a href="http://www.htslib.org">http://www.htslib.org</a>                                                                                                                                            |
| WASP pipeline version 0.3.4                  | van de Geijn et al. <sup>65</sup>                                                                                                  | <a href="https://github.com/bmvdgeijn/WASP">https://github.com/bmvdgeijn/WASP</a>                                                                                                                    |
| GATK/ASEReadCounter version 4.2.0.0          | Castel et al. <sup>66</sup>                                                                                                        | <a href="https://gatk.broadinstitute.org">https://gatk.broadinstitute.org</a>                                                                                                                        |
| VEP (online)                                 | McLaren et al. <sup>67</sup>                                                                                                       | <a href="https://www.ensembl.org/Tools/VEP">https://www.ensembl.org/Tools/VEP</a>                                                                                                                    |
| TOPMed and Michigan Imputation server        | Fuchsberger, Abecasis, and Hinds; NHLBI Trans-Omics for Precision Medicine (TOPMed) Consortium et al.; Das et al. <sup>68–70</sup> | <a href="https://imputation.biodatacatalyst.nih.gov/">https://imputation.biodatacatalyst.nih.gov/</a><br><a href="https://imputationserver.sph.umich.edu">https://imputationserver.sph.umich.edu</a> |
| Original codes and scripts                   | This paper                                                                                                                         | <a href="https://doi.org/10.5281/zenodo.7270242">https://doi.org/10.5281/zenodo.7270242</a>                                                                                                          |

**RESOURCE AVAILABILITY**

**Lead contact**

Further information and requests for resources and reagents should be directed to and will be fulfilled by the lead contact, Dr. Yang Li ([Yang.Li@helmholtz-hzi.de](mailto:Yang.Li@helmholtz-hzi.de)).

**Materials availability**

This study did not generate new unique reagents.

**Data and code availability**

All raw sequencing and genotypes generated during this study are deposited at the European Genome-phenome Archive (EGA) under the accession numbers EGA: EGAZ00001823187, EGAS00001006559, and EGAS00001006560, which are hosted by the EBI and the CRG. Processed data as Seurat objects with scRNA-seq count matrices and ArchR objects with scATAC-seq peak matrices have been deposited via Nubes: <https://nubes.helmholtz-berlin.de/s/wqg6tmX4fW7pci5>. Original codes and scripts used for the analyses are available at GitHub: [https://github.com/CiiM-Bioinformatics-group/MHH50\\_COVID19\\_code](https://github.com/CiiM-Bioinformatics-group/MHH50_COVID19_code) and Zenodo: <https://doi.org/10.5281/zenodo.7270242>.

## EXPERIMENTAL MODEL AND SUBJECT DETAILS

We collected DNA and PBMCs from blood samples of COVID-19 patients. Samples taken on days when patients were hospitalized were considered hospitalized samples and samples taken from discharged patients were considered convalescent samples. Clinical information on age, sex, medication, active days, O<sub>2</sub> supply, etc. is recorded for each sample and listed in [Table S1](#). WHO scores were used to allocate the samples to mild (WHO 3–4) or severe (5–7) conditions according to the WHO clinical ordinal scale. The study was approved by the institutional review board at Hannover Medical School (#9001\_BO\_K2020) and informed consent was obtained from all patients.

## METHOD DETAILS

### Single-cell RNA-seq library preparation and sequencing

Cells were counted, and an equal number of cells from five or six different individuals were pooled together. In total, 16,000 cells in total were loaded into the 10X Chromium™ Controller, and libraries were prepared based on the manufacturer's instructions (Chromium Next GEM Single Cell 3' Reagent Kits v3.1 (Dual Index) User Guide, Rev A, CG000315 Rev A). Library quality per pool was examined using the Agilent Bioanalyzer High Sensitivity DNA kit. Sequencing was carried out on NovaSeq 6000 (Illumina), with a depth of 50,000 reads per cell.

### Single-cell ATAC-seq library preparation and sequencing

Nuclei isolation was performed based on manufacturer's instructions from 10X (CG000169 • Rev D). Briefly, cells were washed and lysed for 3 min on ice. After discarding the supernatant, lysed cells were diluted within 1× diluted nuclei buffer (10x Genomics) and counted using a Countess II FL Automated Cell Counter to validate lysis. An equal number of nuclei from five or six individuals were pooled and then loaded into the Chromium Next GEM Chip H based on the user guides from 10x genomics (Chromium Next GEM Single Cell ATAC Reagent Kits v1.1 User Guide, CG000209 Rev D). After breaking the emulsion, the barcoded tagmented DNA was purified and amplified for sample indexing and generation of scATAC-seq libraries. The final library was quantified using the Agilent Bioanalyzer High Sensitivity DNA kit. Sequencing was performed on NovaSeq 6000 (Illumina) with a depth of 25,000 reads per nuclei.

### Genotyping

Genotyping of DNA samples isolated from subjects in the current study were performed using the GSA-MDv3 array (Infinium, Illumina) following the manufacturer's instructions. In total, 725,875 variants of 48 individuals were called by Optical 7.0 with default settings.

## QUANTIFICATION AND STATISTICAL ANALYSIS

### Genotype imputation

Quality control (QC) for raw variants was performed using PLINK.<sup>71</sup> In brief, no sample was excluded initially due to failure in sex-check (–check-sex). Then, low-quality variants and individuals were excluded by parameters –geno 0.1 –mind 0.1. Next, missingness of genetic information and rates of heterozygosity were filtered by –missing and –het, respectively. After QC, 719,942 variants from 48 individuals were retained for the imputation procedure. The clean raw variants were uploaded to the TOPMed Imputation Server and imputed against the TOPMed (Version R2 on GRCh38) reference panel.<sup>70</sup> The imputed variants (n = 290,971,705) were downloaded and filtered by BCFtools,<sup>64</sup> excluding variants with R2 < 0.5, with 14,232,029 variants retained for the downstream analysis.

Additional QC and annotation was performed to obtain the genotypes that were used in the ASoC analysis. The variants were assigned reference SNP id (rs) by BCFtools against common variants (b151 GRCh38) downloaded from dbSNP. Subsequently, only variants that have rs numbers and that were heterozygous in at least three individuals were retained for the ASoC analysis.

### Data pre-processing and demultiplex of 10x genomics Chromium scRNA-seq data

BCL files from each library were converted to FASTQ files using bcl2fastq Conversion Software (Illumina) using the respective sample sheet with the 10x barcodes utilized. The proprietary 10x Genomics Cell Ranger pipeline (v4.0.0) was used with default parameters. Cell Ranger was used to align read data to the reference genome provided by 10x Genomics (Human reference dataset refdata-cellranger-GRCh38–3.0.0) using the aligner STAR,<sup>72</sup> and a digital gene expression matrix was generated to record the number of UMIs for each gene in each cell.

The single-cell transcriptome in each library was further demultiplexed by assigning cell barcodes to their donor. The pre-mapped bam files of each library were loaded to SoupCell (v1.3gb)<sup>73</sup> for a genotype-free SNP-based demultiplex with default settings, where candidate variants were called for each library and cells from each library were clustered into different samples based on their allele patterns. SNPs called from each sample were then matched with known genotypes of donors to assign a donor ID to each sample. The demultiplex assignments were double-checked using the expression of Y chromosome genes (*ZFY*, *RPS4Y1*, *EIF1AY*, *KDM5D*, *NLGN4Y*, *TMSB4Y*, *UTY*, *DDX3Y*, and *USP9Y*) in male samples.

### Data pre-processing and demultiplex of 10x genomics Chromium scATAC-seq data

BCL files from each library were converted to FASTQ files using bcl2fastq Conversion Software (Illumina) using the respective sample sheet with the 10x barcodes utilized. The proprietary 10x Genomics CellRanger-ATAC pipeline (v1.2.0) was used with default parameters. CellRanger-ATAC was used to align read data to the reference genome provided by 10x Genomics (Human reference dataset refdata-cellranger-atac-GRCh38-1.2.0) and a fragments matrix was generated to record the number of reads for each open chromatin region in each cell.

The cells in each library were further demultiplexed by assigning cell barcodes to their donor. The pre-mapped bam files of each library were loaded to Soupcorell (v1.3gb) for genotype-free SNP-based demultiplexing. To call robust SNPs from the ATAC-seq samples, candidate variants were first called by freebayes<sup>74</sup> with minimal mapping quality = 20, minimal base quality = 20, minimal coverage = 6, and minimal alternative allele = 2. Next, cell allele matrices from each library were generated with vartrix with minimal mapping quality = 20, and cells were clustered based on their allele patterns to identify different samples in one library. SNPs called from each sample were matched with known genotypes of donors to assign the donor IDs.

### Independent sample set

In our cohort, some samples with different disease statuses came from the same donor. To obtain independent samples for pairwise comparison across conditions, we manually selected an independent sample set after QC for both scRNA-seq and scATAC-seq based on the following criteria: one sample per donor, early-stage for multiple stages, with samples shared by scRNA-seq and scATAC-seq data are preferred. The selected samples are marked in [Table S1](#).

### QC for scRNA-seq data

After the demultiplex, the expression matrix from PBMC was loaded to R/Seurat package (v3.2.2)<sup>50</sup> for downstream analysis. To control the data quality, we first excluded cells with ambiguous assignments from Soupcorell demultiplex. Next, we further excluded low-quality cells with >15% mitochondrial reads, <100 or >3,000 expressed genes, or <500 UMI counts (criteria were chosen according to the overall distribution of samples). In addition, genes expressed in less than three cells were also excluded from further analysis.

### Dimensionality reduction and clustering for scRNA-seq data

After QC, we applied LogNormalization (Seurat function) to each cell, where original gene counts were normalized by total UMI counts, multiplied by 10,000 (TP10K), and then log-transformed by  $\log_{10}(\text{TP10k}+1)$ . We then scaled the data, regressing for total UMI counts, and performed principal component analysis (PCA) based on the 2,000 most-variable features identified using the vst method implemented in Seurat. Subsequently, data from each sequencing batch was integrated, using the ‘harmony’ algorithm, based on the first 20 principal components to correct technical differences in the gene expression counts of different libraries. Cells were then clustered using the Louvain algorithm based on the first 20 ‘harmony’ dimensions with a resolution of 0.4. For visualization, we applied UMAP based on the first 20 dimensions of the ‘harmony’ reduction.

### Annotation of scRNA-seq clusters

Clusters were annotated based on a double-checking strategy: 1) checking by automatic annotation with R/SingleR package<sup>75</sup> and 2) manually checking the expression of cluster markers or known marker genes. Specifically, automatic annotation was applied with five pre-installed reference datasets in SingleR: HumanPrimaryCellAtlas data (HPCA),<sup>76</sup> BlueprintEncode data,<sup>77,78</sup> ImmuneCellExpression data,<sup>79</sup> Novershtern Hematopoietic data,<sup>80</sup> and MonoclonalImmune data.<sup>81</sup> Cluster marker genes were identified by comparing gene expression of each cluster to all other clusters of the tested dataset using the FindAllMarkers function in Seurat with the Wilcoxon rank-sum test. Only upregulated genes with a log-fold change >0.25 and a Bonferroni-corrected p-value <0.05, and were expressed in at least 25% of cells were calculated for each cluster, and genes from each cluster of interest were ranked by their log-fold changes.

In addition, T and NK cell clusters were further characterized by expression of marker genes related to memory T cells (*IL7R*), naive/central memory (*SELL*, *CCR7*), cell cytotoxic (*CD8A*, *CD8B*, *NKG7*, *GZMB*), interferon responses (*IFI6*, *ISG15*), and other data-derived cluster markers ([Table S2](#)). Monocyte clusters were then characterized by classical and non-classical monocyte markers (*CD14*, *FCGR3A*) and pro-inflammatory cytokines (*TNF*, *IL1B*), and the data-derived cluster markers, such as *CD163* ([Table S2](#)).

### DE-Gs across Covid-19 conditions

For pairwise comparison between COVID-19 conditions, differential expression (DE) tests were performed using the FindMarkers functions in Seurat with the Wilcoxon rank-sum test. The non-parametric Wilcoxon rank-sum test is distribution-free, but the results may still be biased by age effects. We therefore also performed DE tests using MAST,<sup>82</sup> where we fit a hurdle model to the expression of each gene consisting of a linear regression for age as supplementary results. In both tests, genes with a log-fold change >0.05 and a Bonferroni-corrected p-value <0.05, and were expressed in at least 10% of tested groups were regarded as significantly differentially expressed.

### QC for scATAC-seq data

After alignment and demultiplex, we used ArchR,<sup>51</sup> a full-featured scATAC-seq analysis package, with minor adaptation to analyze our scATAC-seq data. Briefly, we created an Arrow file for the CellRanger mapped fragments file from each single-cell library and annotated the cells with the Souporcell demultiplex assignments. For QC, we filtered out cells that had fewer than 1,000 unique fragments, a transcription start site enrichment  $<4$ , or potential doublets recognized by the ArchR package. We also excluded cells with ambiguous assignments from Souporcell demultiplex. Finally, an ArchRProject combining all of the Arrow files was created for downstream analysis.

### Dimensionality reduction and clustering for scATAC-seq data

After QCI, we used the ArchR function 'addIterativeLSI' to process iterative latent semantic indexing using the top 25,000 variable features and top 30 dimensions. We then used the harmony algorithm to correct batch effects from different libraries and clustered cells based on the results with a resolution of 0.8. For visualization, we applied UMAP based on the dimensions of the 'harmony' reduction with nNeighbors = 30 and minDist = 0.5.

### Annotation of scATAC-seq clusters

To annotate the scATAC-seq clusters, gene scores were calculated and imputed for each cell, and marker genes from each cluster were detected with functions in ArchR package. Briefly, we firstly use 'addGeneScoreMatrix' function to independently compute gene activity scores per cell, then applied 'addImputeWeights' to impute gene scores by smoothing the signal across nearby cells using the MAGIC algorithm. Next, we compared independent gene scores between cells from one cluster and all the other clusters using the Wilcoxon rank-sum test to detect cluster-specific genes. The 'bias' parameter in 'getMarkerFeatures' from ArchR was used to account for transcription start site enrichment scores and the number of unique fragments per cell during the comparison. Finally, we visualized these genes and other cell-type-specific marker genes used for our scRNA-seq data to assign an identity to each cluster.

### Peaks calling and marker peaks detection

To generate a comparable peak matrix for cross-sample comparison of differential open chromatin accessibility, reproducible peaks were called based on the pseudo-bulk replicates for each condition and clustered using the 'addReproduciblePeakSet' functions with Macs2 algorithm.<sup>83</sup>

After adding a peak matrix based on the called reproducible peaks, we applied differential peak detection with the Wilcoxon rank-sum test, again accounting for transcription start site enrichment scores and the number of unique fragments per cell during the comparison. For marker peaks per cell type and disease conditions, peaks were compared between cells from the tested group and cells from all other groups, and peaks with FDR  $<0.05$  were considered as significant cell type- and/or condition-specific peaks. For pairwise comparison between conditions within a cell population, peaks with p-value  $<0.05$  were considered as nominal differential accessible peaks and used for integrative analysis with DE-Gs.

### TF motif annotation and enrichment

After calling peaks, we looked for the motifs that are enriched in peaks that are openly accessible in different cell types and conditions. To do this, we first added motif annotation based on the "CIS-BP" database,<sup>84</sup> then, we applied the 'peakAnnoEnrichment' function in ArchR to obtain overrepresented motifs in test peak sets.

### Cross-platform linkage of scATAC-seq data with scRNA-seq data

To do an integrative analysis of scATAC-seq and scRNA-seq data, we performed a preliminary integration by aligning all cells from scATAC-seq with cells from scRNA-seq by comparing the above-mentioned scATAC-seq cell-independent gene score matrix with the scRNA-seq expression matrix using the 'FindTransferAnchors' function from the Seurat package and the 'addGeneIntegrationMatrix' function from the ArchR package. Based on the result of this initial integration and the cell type annotation, we filtered out undefined scATAC-seq clusters and clusters with  $<100$  cells aligned to annotated scRNA-seq clusters. We then annotated remaining scATAC-seq clusters based on the aligned scRNA-seq clusters. Finally, we re-ran the integration process by aligning remaining scATAC-seq cells to cells from the aligned scRNA-seq clusters and created a gene-integration matrix by adding gene integration scores to each cell.

### Peak-to-gene linkage

To find potential regulation from peaks to genes, we inferred a peak-to-gene linkage by calculating the correlation between peak accessibility and gene expression within the above-mentioned integrated scRNA-seq and scATAC-seq cells. A co-accessibility  $>0.45$  and FDR-adjusted  $p < 0.05$  were regarded as regulatory links.

### TF footprinting with scATAC-seq data

To calculate the TF footprint for each motif, we first obtained all the positions from one TF motif. To profile the footprint, cells were grouped again by each condition and each cell type to create pseudo-bulk ATAC-seq profiles. To account for the insertion sequence

bias of the Tn5 transposase, which can lead to misclassification of TF footprints, we used the “Subtract” normalization method to subtract the Tn5 bias from the footprinting signal.

### Sub-clustering of monocyte compartments in scRNA-seq

In the scRNA-seq dataset, the monocyte subpopulations were investigated by applying sub-clustering on the three monocyte clusters (cMono, CD163+ cMono, and ncMono) identified in PBMC. We first identified the 1,000 most-variable features again in monocytes using the vst method implemented in Seurat. Next, we scaled the data and performed PCA based on these 1,000 most-variable features. Subsequently, the cells were clustered using the Louvain algorithm based on the top-10 PCs with a resolution of 0.3. For visualization, we applied UMAP based on the top-10 PCs. The marker genes for each sub-cluster were calculated by the FindAllMarkers function in Seurat and a contaminated lymphocyte cluster with CD3 gene expression was identified and removed from further analyses.

AUCell-based gene signature scores were calculated using the AUCell method.<sup>27</sup> We set the threshold for the calculation of the AUC to the top 3% of ranked genes and normalized the maximum possible AUC to 1. Top-30 marker genes reported from monocytes and macrophages reported in BAL fluid and PBMC<sup>4</sup> were used to calculate AUC scores for each monocyte sub-clusters respectively. The resulting AUC values were subsequently visualized in violin plots.

### Sub-clustering of monocyte compartments in scATAC-seq

In the scATAC-seq dataset, the two monocyte clusters (cMono and ncMono) identified in PBMC were extracted and investigated for sub-clustering analyses. Again, we used ArchR function ‘addIterativeLSI’ to process iterative latent semantic indexing using the top-25,000 variable features and top-30 dimensions. We then clustered cells based on the IterativeLSI reduced dimensions with a resolution of 0.8 and calculated UMAP with nNeighbors = 30 and minDist = 0.5. The resulting sub-clusters were aligned to scRNA-seq monocyte sub-clusters using the Cross-platform linkage method described above. Cells with a predicted linkage score >0.6 were regarded as aligned cells, and a scATAC-seq sub-cluster with a percentage of aligned cells >90% matched to the same scRNA-seq sub-cluster was regarded as the confidently matched sub-cluster.

### TF gene expression and regulon enrichment analysis

In order to estimate the expression of the motif-enriched TFs in R4/C4 monocyte cluster, we ranked the genes based on their expressed percentages of R4 cells from hospitalized COVID-19 patients in scRNA-seq dataset and marked out TF genes among them. Next, we applied a regulon enrichment analysis across genes that were expressed at least 10% of R4 cells with SCENIC.<sup>27</sup> Then, we intersected the enriched TFs, that were marked with ‘high confidence’ annotations by the algorithm, with the TF-motif enrichment results and marked the overlap TFs on the Heatmap.

### Chromatin accessibility of COVID-19 risk variants

The genetic variants with a reported p-value  $< 5 \times 10^{-8}$  from the COVID-19 GWAS summary statistics (Hospitalized covid vs. population” release 6) by HGI<sup>14</sup> were considered as risk variants of COVID-19. An open-chromatin peak was regarded to be associated with risk variants if its genomic location overlaps with at least one significant variant. The over-representation of “risk-variants-overlapping” peaks was estimated by the Fisher exact test comparing between peaks found in hospitalized patients and convalescent samples in each cell type, respectively.

### Identification of ASoC SNPs

To estimate the allelic open chromatin for each identified cell type, the ATAC-seq reads of each subject were first split into individual BAM files per cell type using an in-house Python script according to the CB barcode which was added by CellRanger pipeline and error-corrected. The resulting BAM files were then calibrated using the WASP<sup>65</sup> pipeline with Bowtie2<sup>62</sup> as aligner (-X 2000) to remove the mapping bias to reference allele at heterozygous sites. Afterward, the GATK/ASEReadCounter tool<sup>66</sup> was used to count allelic reads at each heterozygous site with the default parameters. To detect the maximum allelic imbalance, the read counts from each subject were allelically summed for each cell type at each heterozygous SNP, a pool approach that was justified in the previous study.<sup>43</sup> Finally, only biallelic SNP sites with at least 20 read counts and at least 2 read counts for either allele were retained for downstream statistical analyses. To alleviate possible mapping bias to the reference allele, the WASP pipeline was applied, but no apparent bias effect was observed (Figure S10A).

Binomial p values were calculated for the allelic read counts per SNP per cell-type by the R function binom.test(), with the alternative read counts as success trials and all read counts as total trials. Next, the R function p.adjust() was exploited to perform a multiple testing correction using the “fdr” method, and an FDR-adjusted p < 0.05 was considered the significant threshold. No obvious mapping bias to reference alleles was observed by visualizing the volcano plot of -log10(p values) and allelic read counts ratio.

### Annotation and function enrichment of ASoC SNPs

To understand the function of the identified allelic imbalances, the ASoC SNPs were annotated against the GRCh38 reference genome using the online version of vep.<sup>67</sup> Next, epigenomic annotations from RoadMap epigenomics projects<sup>85</sup> were assigned

to each identified ASoC SNPs based on their physical position and cell type. These epigenomic annotations were further grouped into promoters (including “TssA”, “PromU”, “PromD1”, and “PromD2”) and enhancers (including “TxReg”, “TxEnh5”, “TxEnh3”, “TxEnhW”, “EnhA1”, “EnhA2”, “EnhAF”, “EnhW1”, “EnhW2”, “EnhAc”, and “DNase”). To evaluate the effects of the identified ASoC SNPs, significant variant-gene pairs of whole blood tissue were downloaded from the GTEx Portal (V8) and allocated to the corresponding ASoC SNPs. Further, the DE genes identified by scRNA-seq between each pair of conditions in the current study were also attached to ASoC SNPs if the transcription start site of the gene is located in a 50Kbp-window of the ASoC SNPs. In addition, ASoC SNPs were allocated to TFs if the corresponding TF motifs were identified by chromVAR in scATAC-seq analysis of the current study. Finally, all the enrichment estimations were performed by R function `fisher.test()` while the adjustment of p values from multiple tests were done by `p.adjust()` using the “fdr” method except for those indicated in the context.

### Correlation between allelic imbalance and motif disruptions

To test the effects of ASoC SNPs, i.e. a genetic perturbation, on TF binding motifs, we calculated motif break scores at each ASoC SNP using R package `motifbreakR`.<sup>30</sup> Concretely, for each cell type, we first compiled a set of ASoC SNPs that are in the TF binding footprints identified in the TF binding footprints analysis. Subsequently, the disruptiveness of ASoC SNPs on TFBS were evaluated using `motifbreakR()` function with parameters: `threshold = 1 × 10-4`, `method = "log"`, `bkg = c(A = 0.25, C = 0.25, G = 0.25, T = 0.25)`. Next, only SNPs with a “strong” effect were retained, and motif break scores were represented by `alleleDiff` which is calculated by the difference between the `scoreAlt` and `scoreRef` in the `motifbreakR` results. Then, for each cell type of each condition, we estimated the correlation between motif break scores and allelic imbalance for each TF motif using Spearman’s rank correlation using `cor.test()` R function. The allelic imbalance was evaluated by the `log2-transform` ratio between alternative and reference ATAC-seq read counts per ASoC SNP. Finally, the correlations measured by Spearman’s rho were plotted as a heatmap using the `ggplot2` package.

### Multi-omics integration from the public resource and the current study

The functions of ASoC SNPs were also evaluated in scenarios of multi-omics integration. We downloaded publicly available GWAS/omics data, including COVID-19 GWAS summary statistics by HGI,<sup>14</sup> whole blood eQTL summary statistics from the meta-analysis by eQTLGen,<sup>33</sup> and promoter capture Hi-C data from Javierre and colleagues’ study.<sup>32</sup> After integrating with scATAC-seq read depth, peak-to-gene links, and ASoC SNPs from the current study, the cross-omics results were visualized by the R/Gviz package<sup>59</sup> along the genomic coordinates to show the ASoC SNP examples. Specifically, the track for promoter capture Hi-C and peak-to-gene links were visualized by R/GenomicInteractions.<sup>58</sup>

### CRISPR- and inhibitor-experiments

Cells deficient in LUCAT1 were generated using a lentiviral CRISPR interference vector (Addgene #71237). A gRNA inserts targeting the transcriptional start site of LUCAT1 was cloned into the vector followed by lentiviral particle production. To this end, HEK293T cells were transfected with the lentiviral vector, a VSVG pseudotyping plasmid (pVSVG) and a helper-plasmid (psPAX2), using lipofectamine 2000 reagent. Viral particles were collected by passing transfected cell supernatants through a 0.45 μm filter, followed by ultracentrifugation. For transduction, the viral pellet was resuspended in PBS and transferred to THP1 cells, followed by centrifugation at 37°C and 800 g for 2 h. Transduced cells were enriched using an Aria III cell sorter (BD), based on GFP-expression from the lentiviral backbone.

THP1 and Hek293T cells were cultivated in RPMI 1640 medium (Thermo Fisher), supplemented with 10% FCS (Biochrom) and 1% penicillin/streptomycin solution (Thermo Fisher). Primary monocytes were isolated from Buffy coats (deidentified prior to use) using Lymphoprep gradient centrifugation and CD14-micobeads (Miltenyi) and cultivated in X-vivo 15 medium (Lonza). All cells were kept in a 37°C incubator with a humidified atmosphere containing 5% CO<sub>2</sub>. For inhibitor experiments, cells were pre-incubated with the respective inhibitor for 2 h, followed by further stimulations. IL1α, IFNα were purchased from Preprotech and 3p-hairpin-RNA from Invivogen. Stimulations were carried out for 4 h (100 ng of each factor). RNA was extracted with Trizol reagent and qRT-PCR was done using the High Capacity cDNA Reverse Transcription kit (Thermo Fisher), LUNA Universal qPCR master mix (NEB) and a Quantstudio 3 instrument. Fold-changes based on CT values were calculated using the 2<sup>-ΔΔCT</sup> method.

**Supplemental information**

**Altered and allele-specific open chromatin  
landscape reveals epigenetic and genetic  
regulators of innate immunity in COVID-19**

**Bowen Zhang, Zhenhua Zhang, Valerie A.C.M. Koeken, Saumya Kumar, Michelle Aillaud, Hsin-Chieh Tsay, Zhaoli Liu, Anke R.M. Kraft, Chai Fen Soon, Ivan Odak, Berislav Bošnjak, Anna Vlot, Deutsche COVID-19 OMICS Initiative (DeCOI), Morris A. Swertz, Uwe Ohler, Robert Geffers, Thomas Illig, Jochen Huehn, Antoine-Emmanuel Saliba, Leif Erik Sander, Reinhold Förster, Cheng-Jian Xu, Markus Cornberg, Leon N. Schulte, and Yang Li**



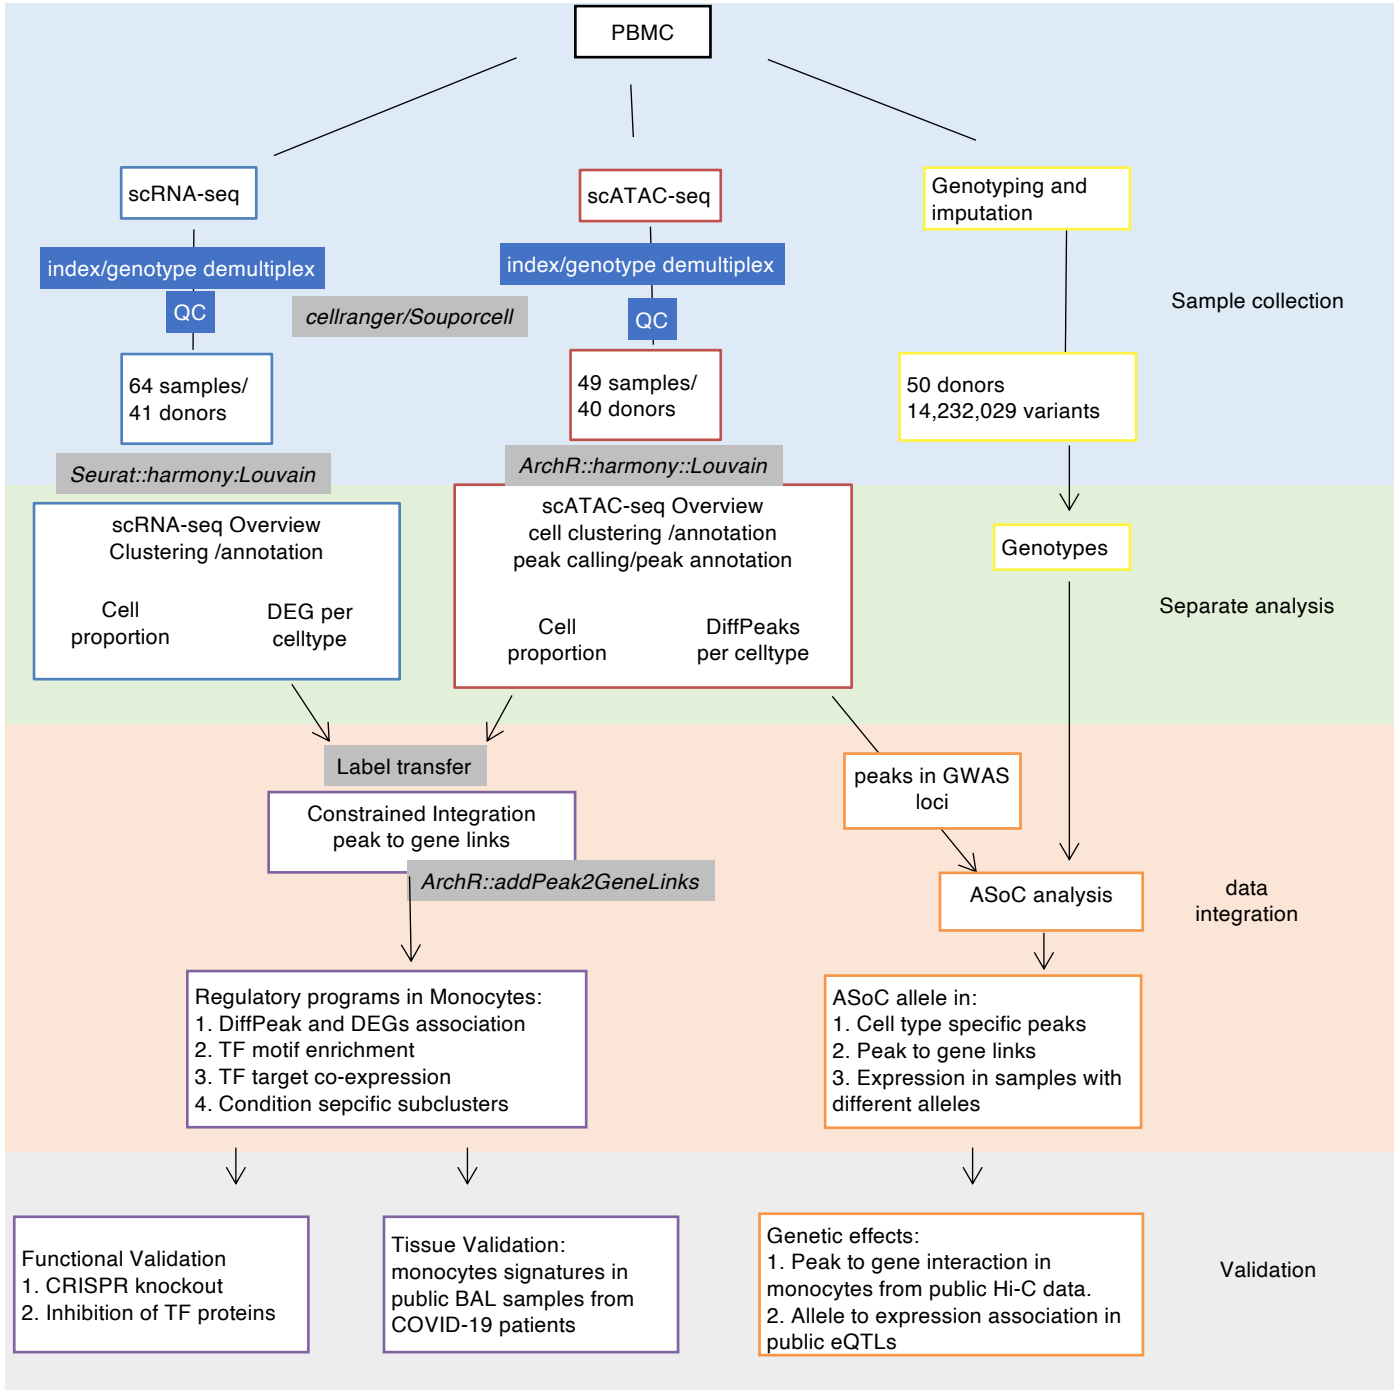

Figure S1. Overview of the analysis pipeline. Related to Figure 1 and STAR Methods.

Before "harmony" in scRNA-seq clustering

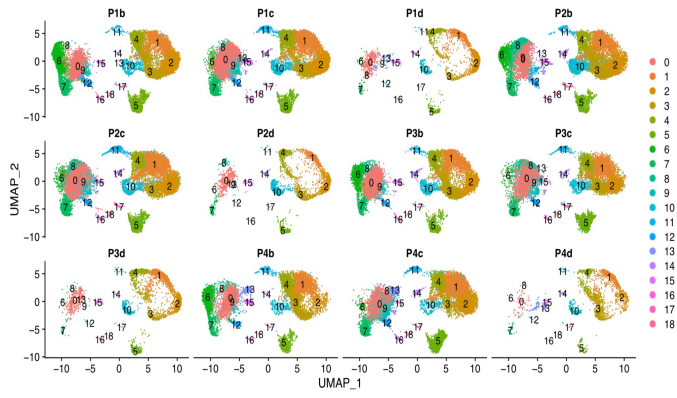

After "harmony" in scRNA-seq clustering

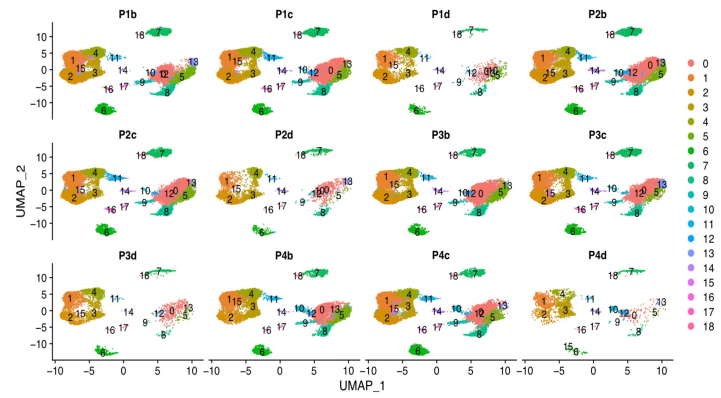

Before "harmony" in scATAC-seq clustering

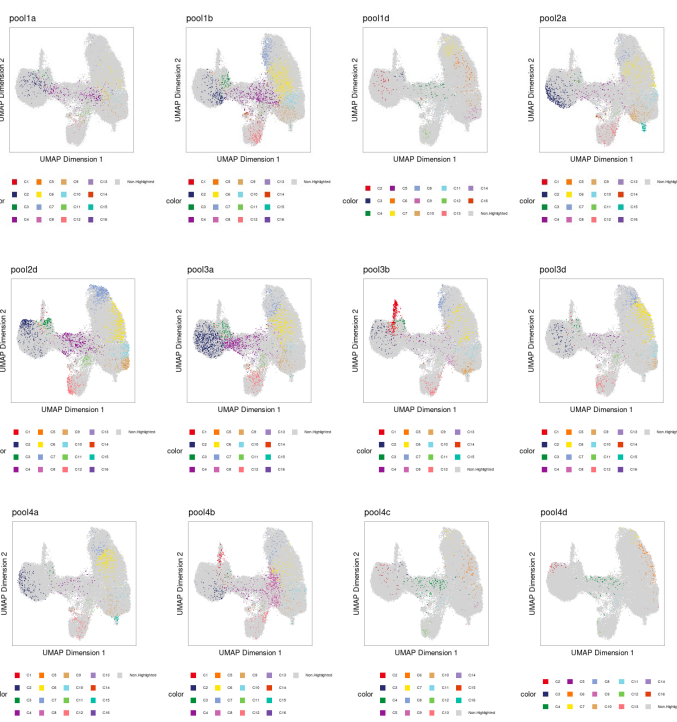

After "harmony" in scATAC-seq clustering

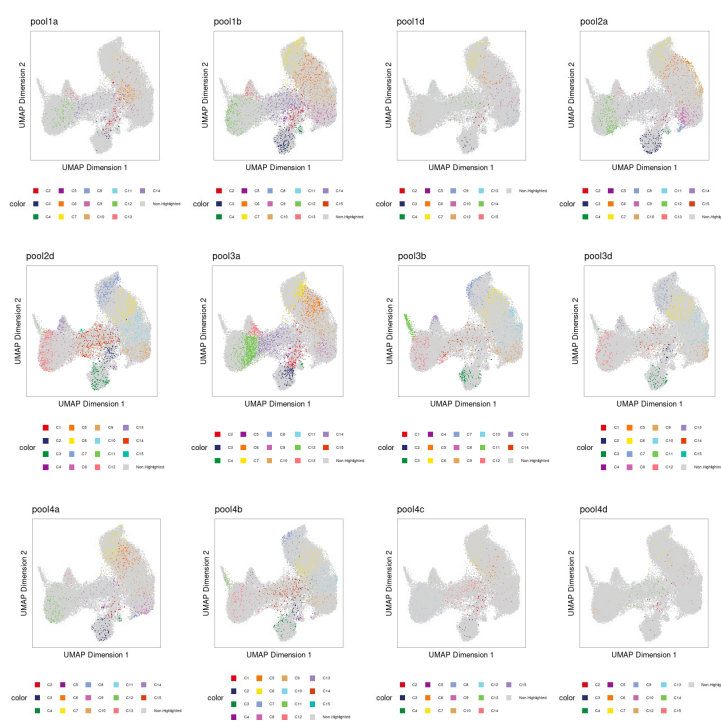

Figure S2. UMAP showing the batch effects before and after harmony integration from each scRNA-seq and scATAC-seq library. Related to STAR Methods.

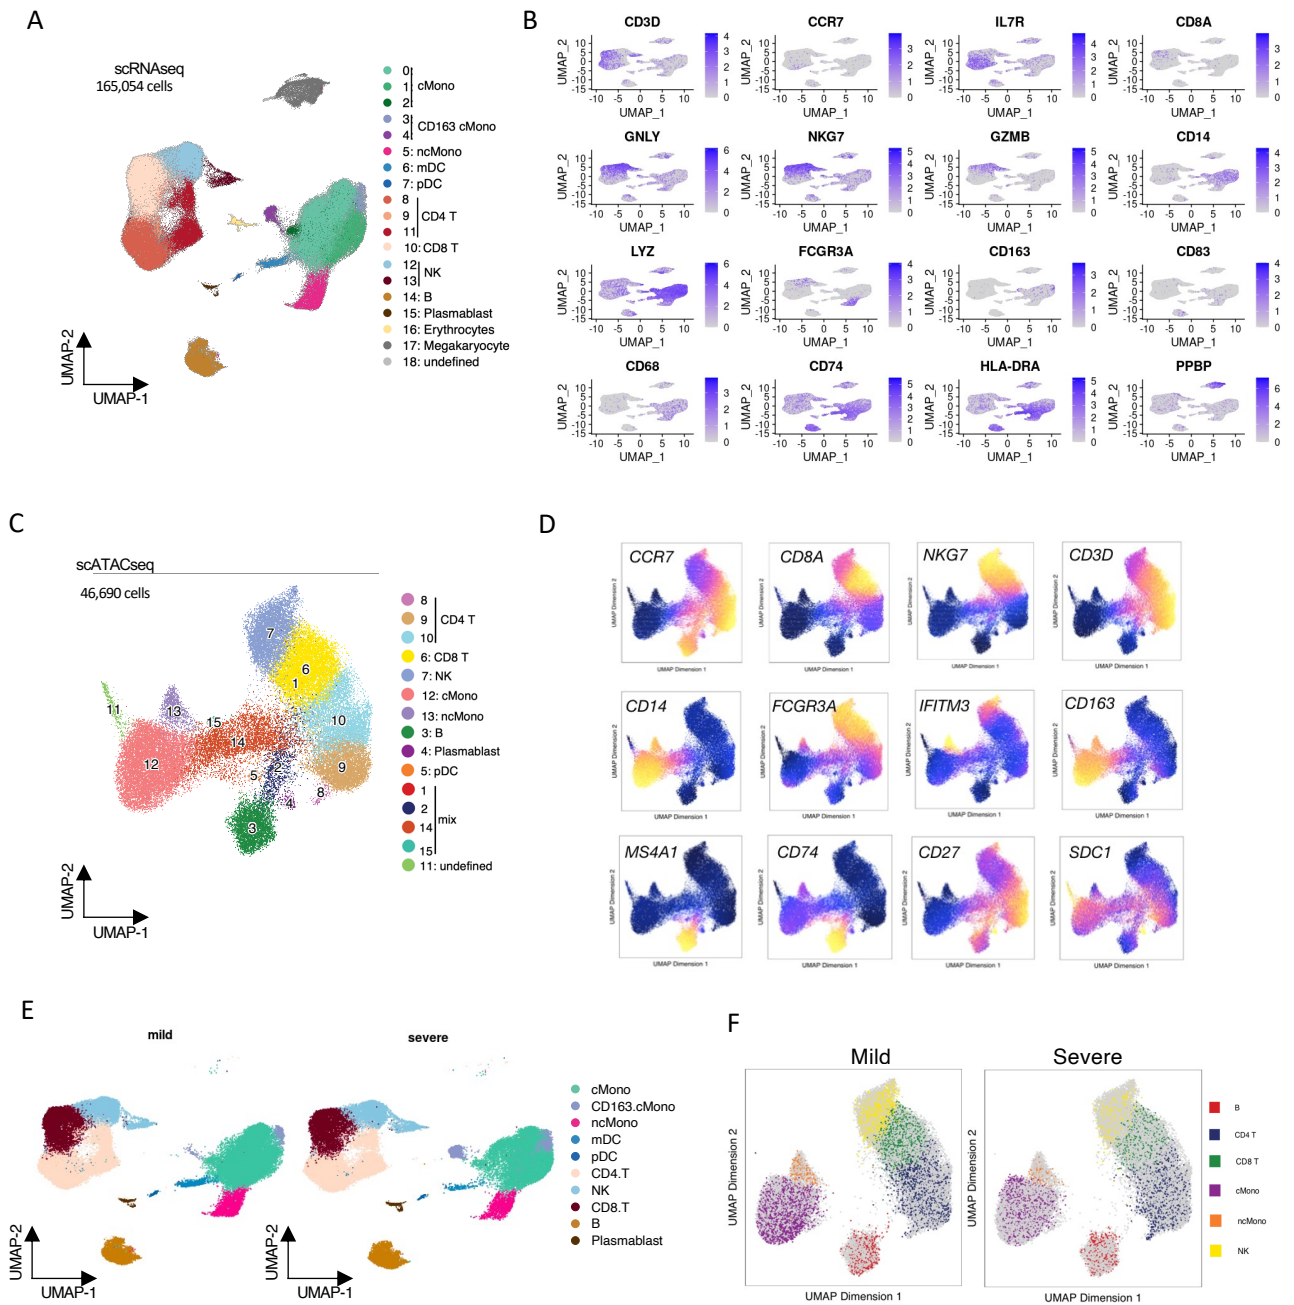

Figure S3. Marker genes and cell type annotation in scRNA-seq and scATAC-seq, related to Figure 1. A. UMAP visualization showing the identified cell clusters from scRNA-seq, 165,054 cells from 64 samples (N = 37 hospitalized, N = 27 convalescent individuals). B. Expression of cell type markers in scRNA-seq clusters. C. UMAP visualization showing the identified cell clusters from scATAC-seq, 46,690 cells across 49 samples (N = 25 hospitalized, N = 24 convalescent individuals), 28 individuals shared between scRNA-seq and scATAC-seq profiling. D. Visualization of imputed marker gene activity scores in scATAC-seq clusters. E. UMAP showing the cell distribution between severe and mild patients in scRNA-seq. F. UMAP showing the cell distribution between severe and mild patients in scATAC-seq.

A.

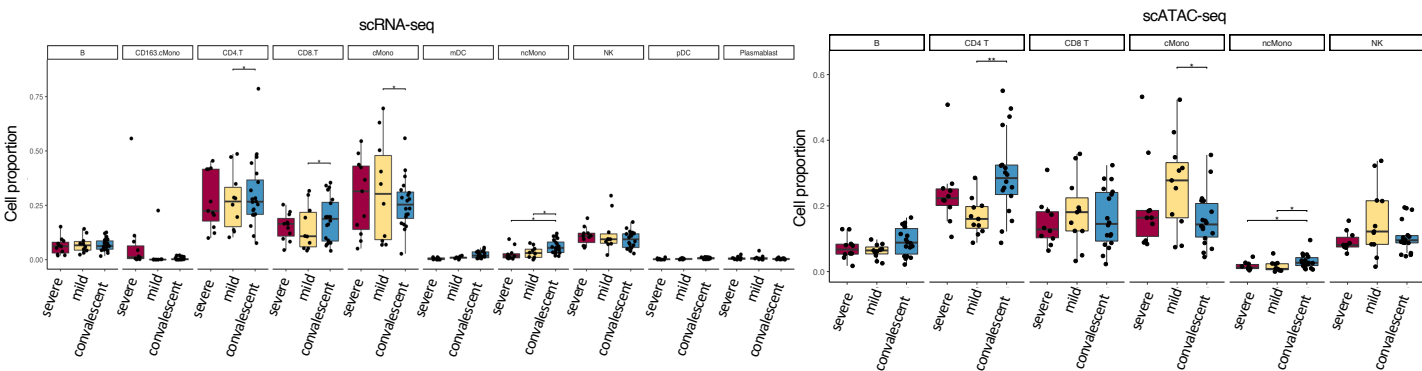

B.

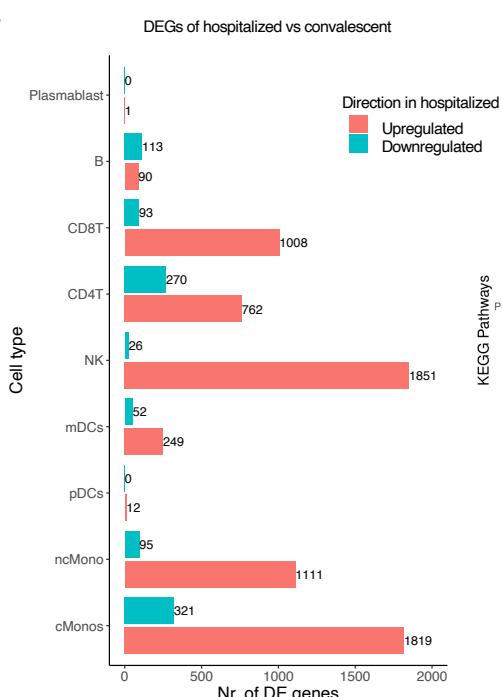

C.

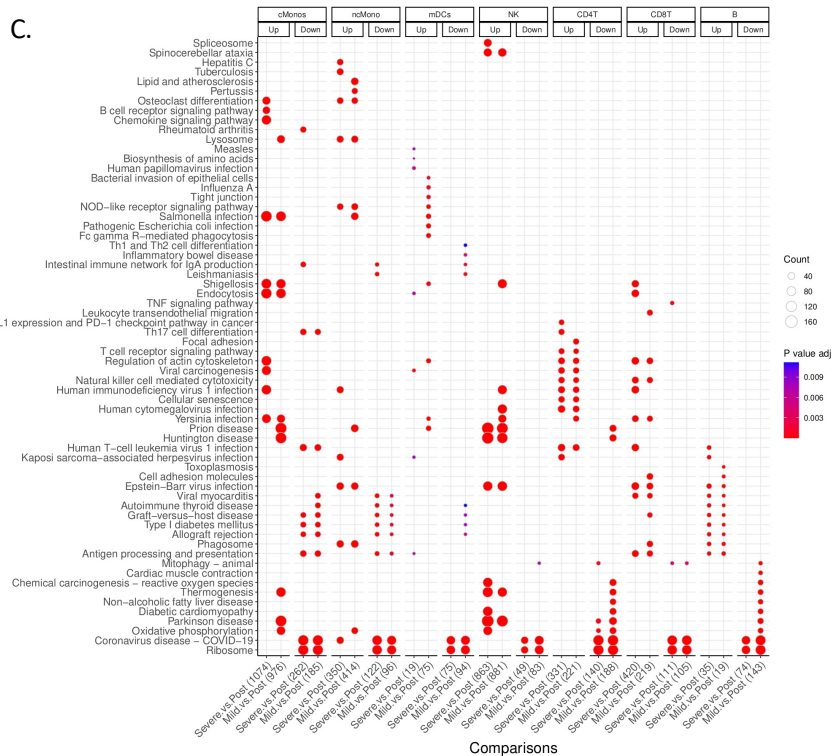

Figure S4. Severity-associated signatures in PBMC clusters, related to Figure 1.

A. Box plots showing the cell proportion of each cell type across severe, mild, and convalescent patients. B. Bar plots showing the number of significant differential expression genes (DEGs) identified in each cell type. DE analysis was performed to compare hospitalized vs convalescent individuals via Wilcoxon ranked-sum test. C. Pathway enrichments of the DEGs identified.

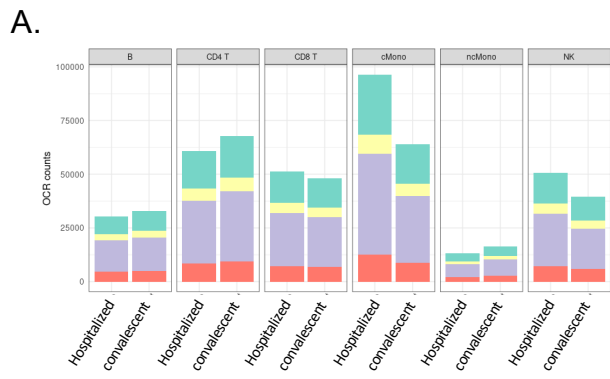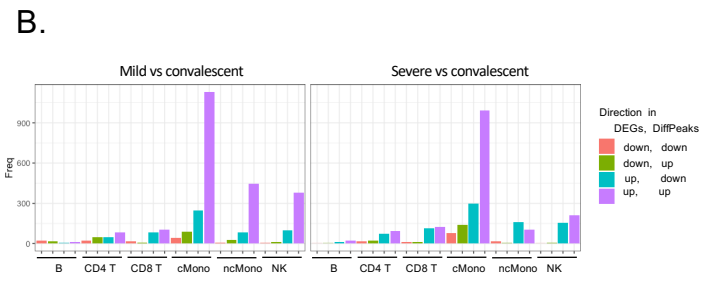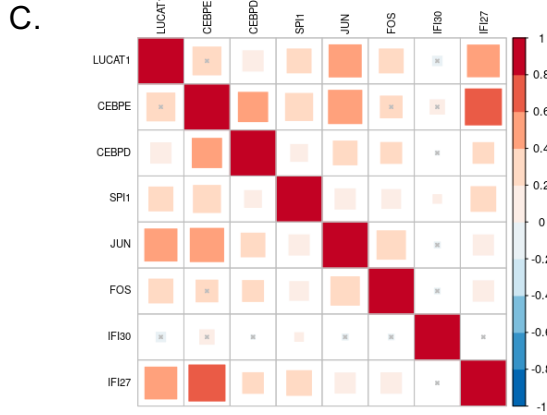

Figure S5. Chromatin accessibility signatures of PBMC clusters in COVID-19 patients, related to Figure 2. A. Bar plots showing the number of regulatory elements in the open chromatin region (OCR) identified in each cell type. These were further classified into ‘distal’, ‘exonic’, ‘intronic’ and ‘promoter’ groups based on genome annotation. B. Barplots showing the overlap of significant differential expression genes (DEGs) and nominal differential accessible peaks (DAP) with shared or opposite regulation direction in hospitalized COVID-19 patients compared with convalescent patients. C. Heatmap showing the expression correlation of LUCAT1, IFI30 and transcriptional factor (TF) genes in classical monocytes of convalescent patients.

A

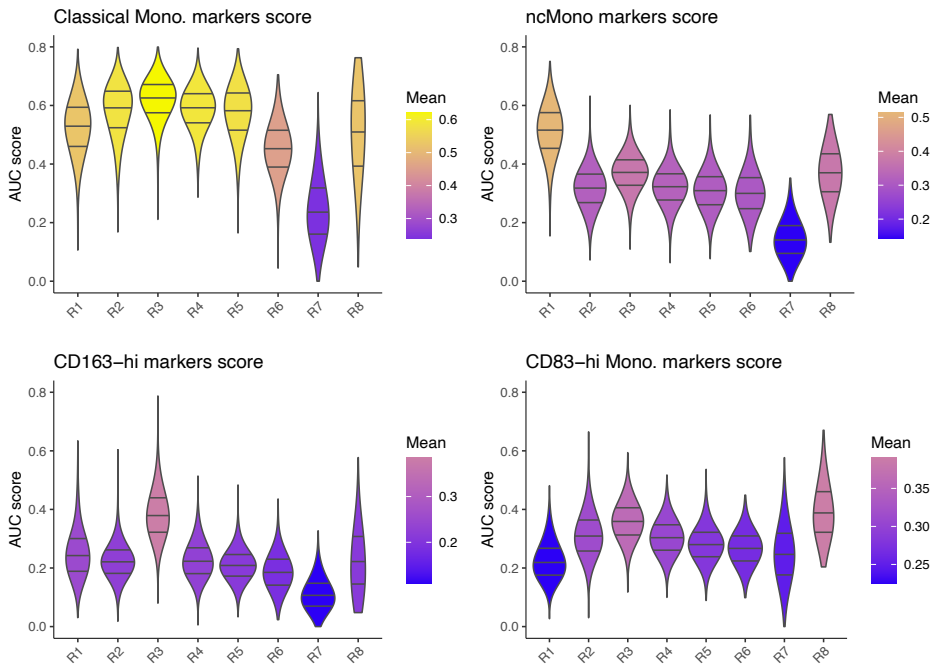

B

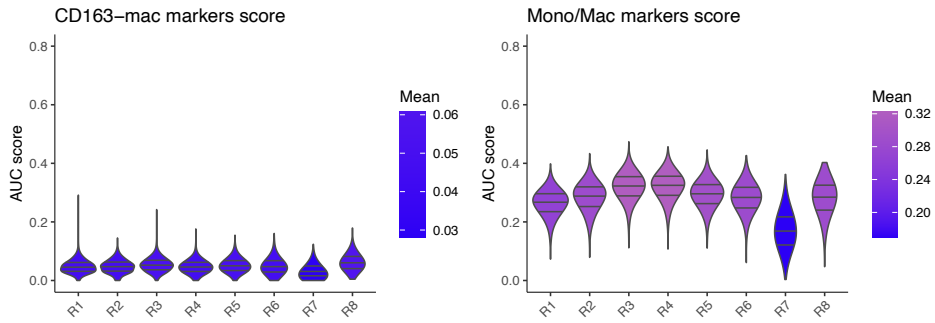

Figure S6. Violin plots showing the AUCCell-based gene signature scores for each sub-clusters, related to Figure 3.

A, AUC scores from monocytes populations in PBMC (Schulte-Schrepping<sup>4</sup>); B, AUC scores from monocytes/macrophages (Mono/M $\phi$ ) and profibrotic pulmonary macrophages (CD163/LGMN-M $\phi$ ) in bronchoalveolar lavage (BAL) fluid (Wendisch<sup>26</sup>).

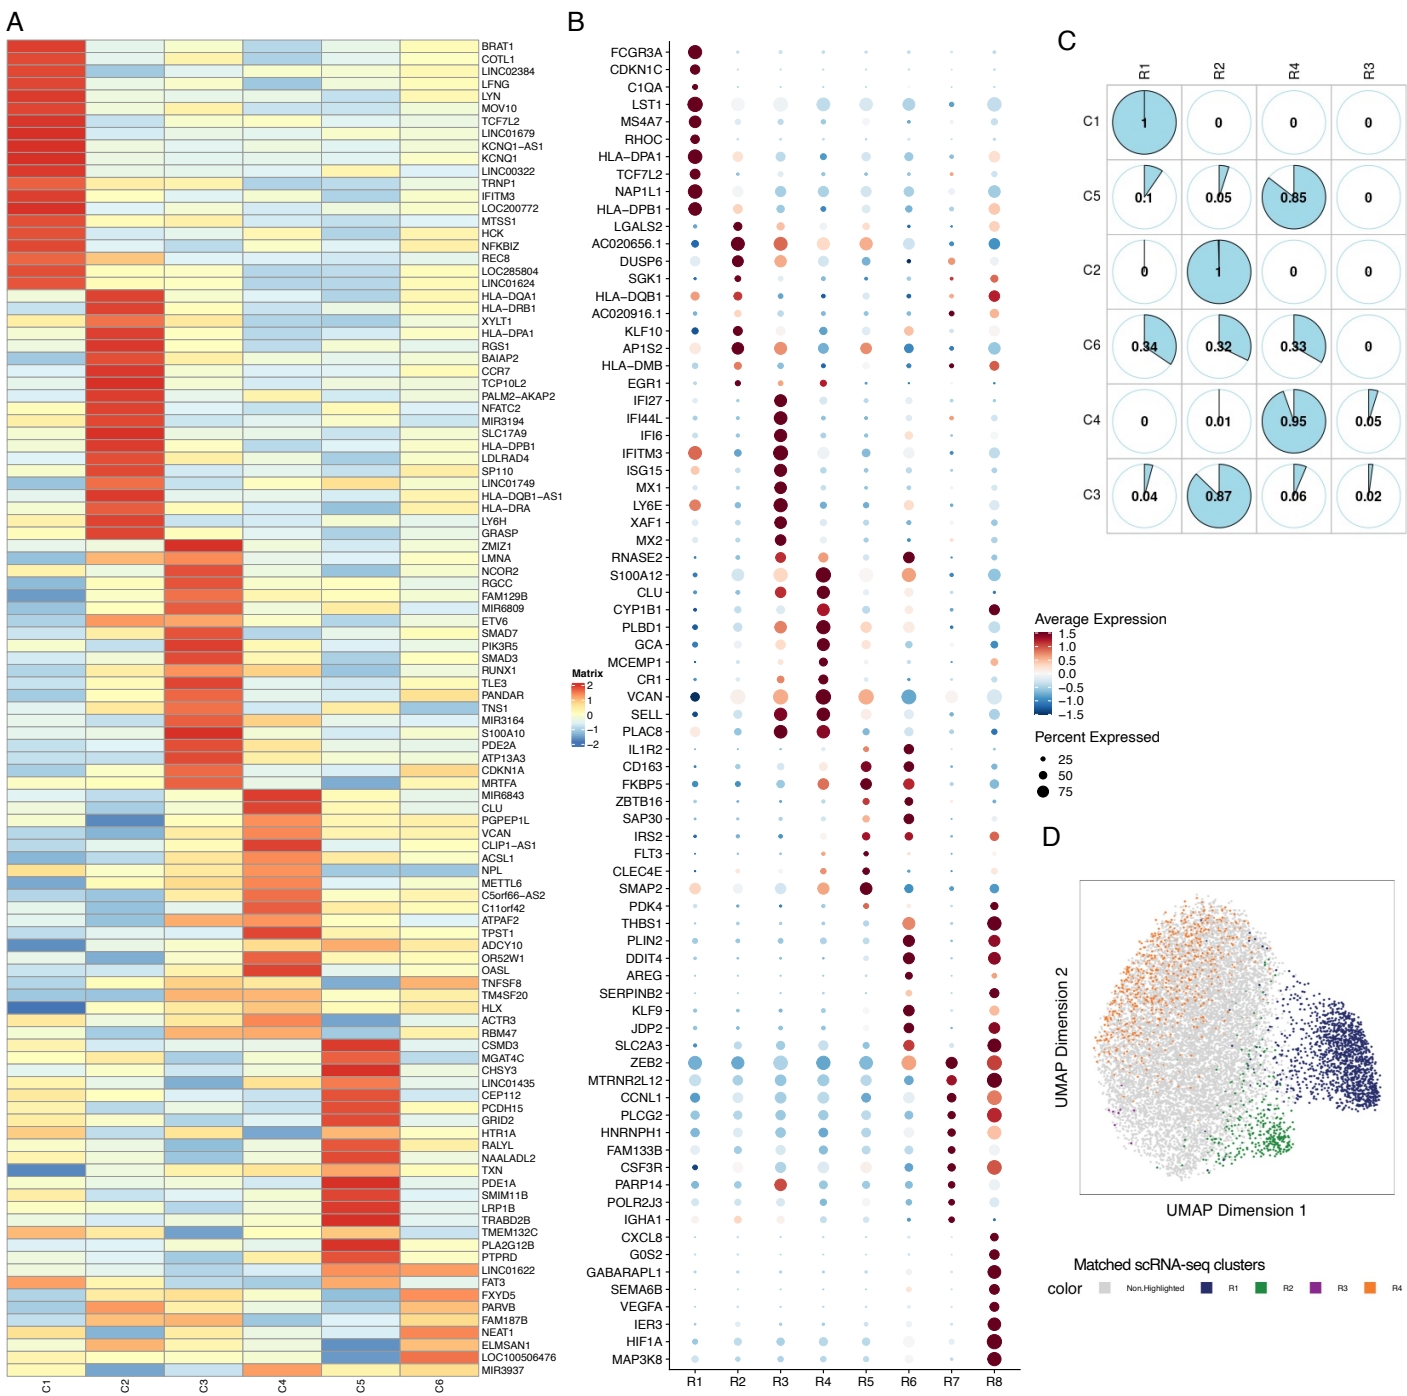

Figure S7. Cross-platform linkage across monocyte sub-clusters identified in scATAC-seq and scRNA-seq, related to Figure 3.

A. Heatmap showing the imputed activity scores of top-20 marker genes identified in monocytes sub-clusters of scATAC-seq. B. Dot plot showing the expression of top-10 marker genes identified in monocytes sub-clusters of scRNA-seq. C. Pie chart showing the percentage of matched cells in each scATAC-seq sub-clusters aligning to each scRNA-seq sub-clusters. D. UMAP showing the distribution of matched identities of cells in scATAC-seq datasets. Cells with a predicted linkage score  $< 0.6$  were regarded as not matched cells and are colored as gray.

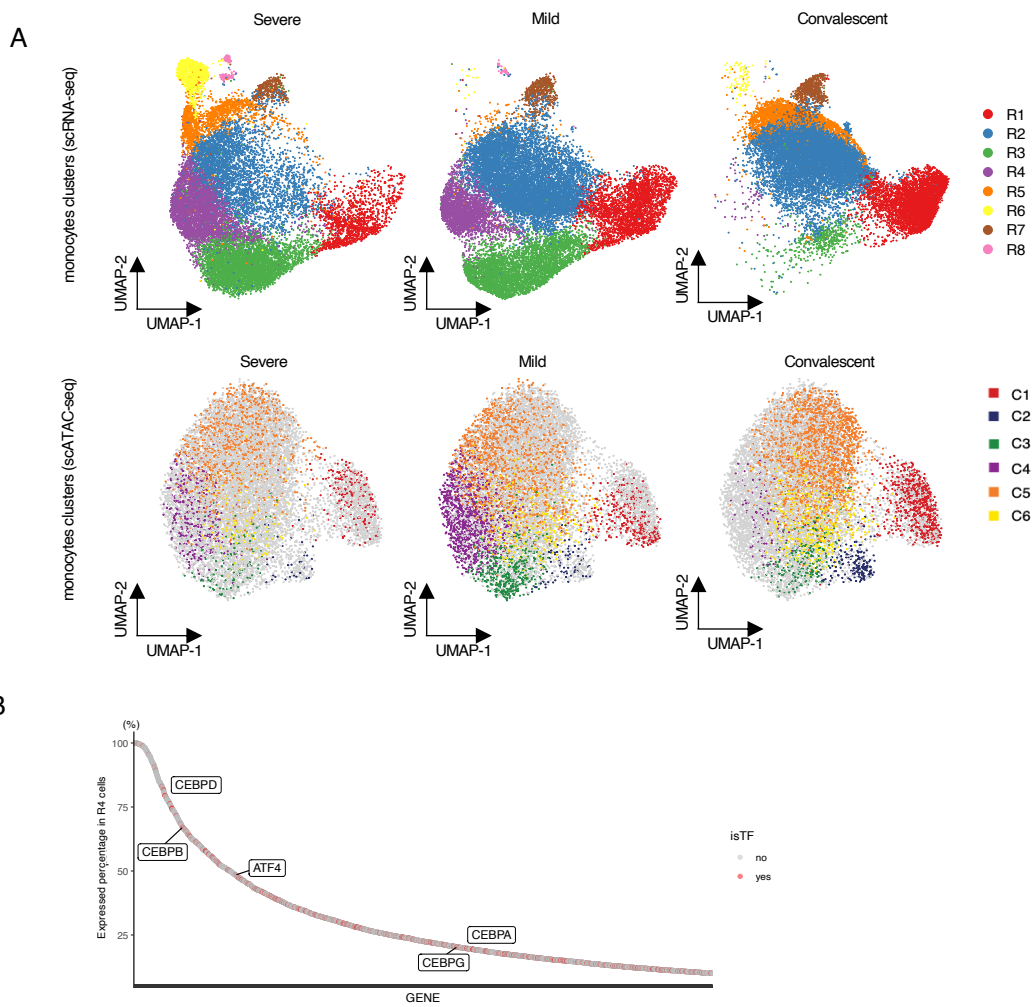

Figure S8. Cell distribution and gene ranks in monocyte subclusters, related to Figure 3.

A. UMAPs showing the distribution of monocytes subclusters across severe, mild and convalescent patients from the scRNA-seq (top row) and scATAC-seq (bottom row), respectively. B. Gene expressed percentage of cells from hospitalized COVID-19 patients in R4 clusters. TF genes are marked in RED.



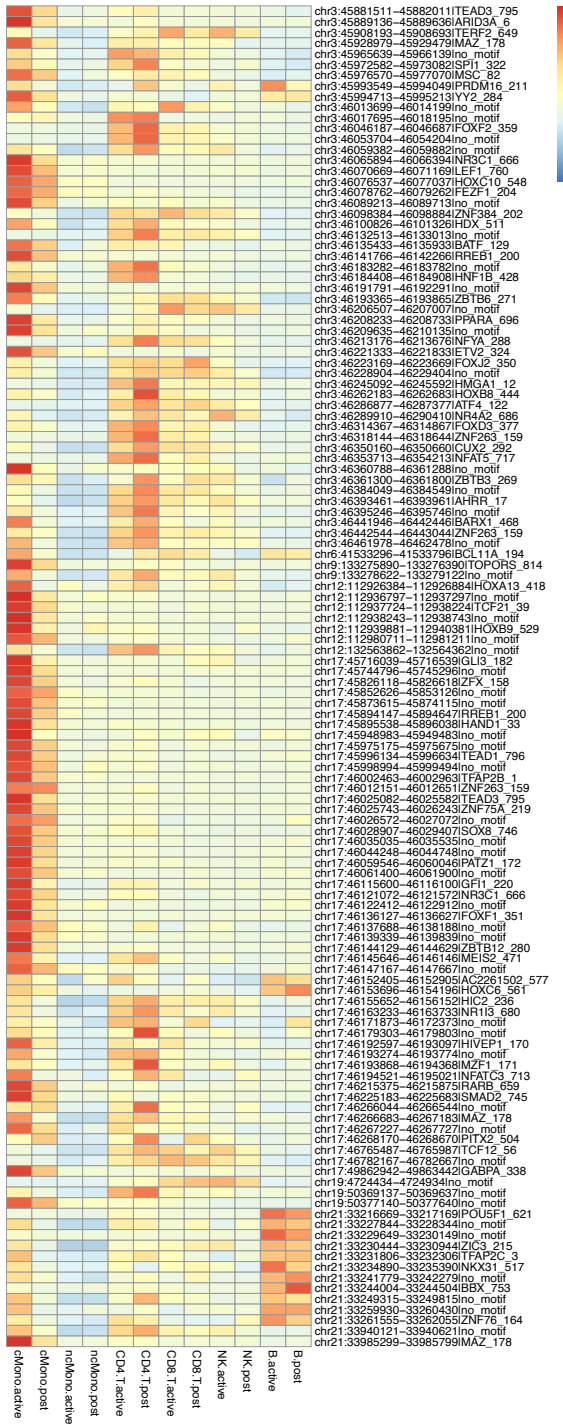

Figure S9. Full heatmap showing chromatin accessibility of peaks detected with hospitalized COVID-19 risk variants, related to Figure 4B. TF motifs that bind to peaks are indicated on the row names.

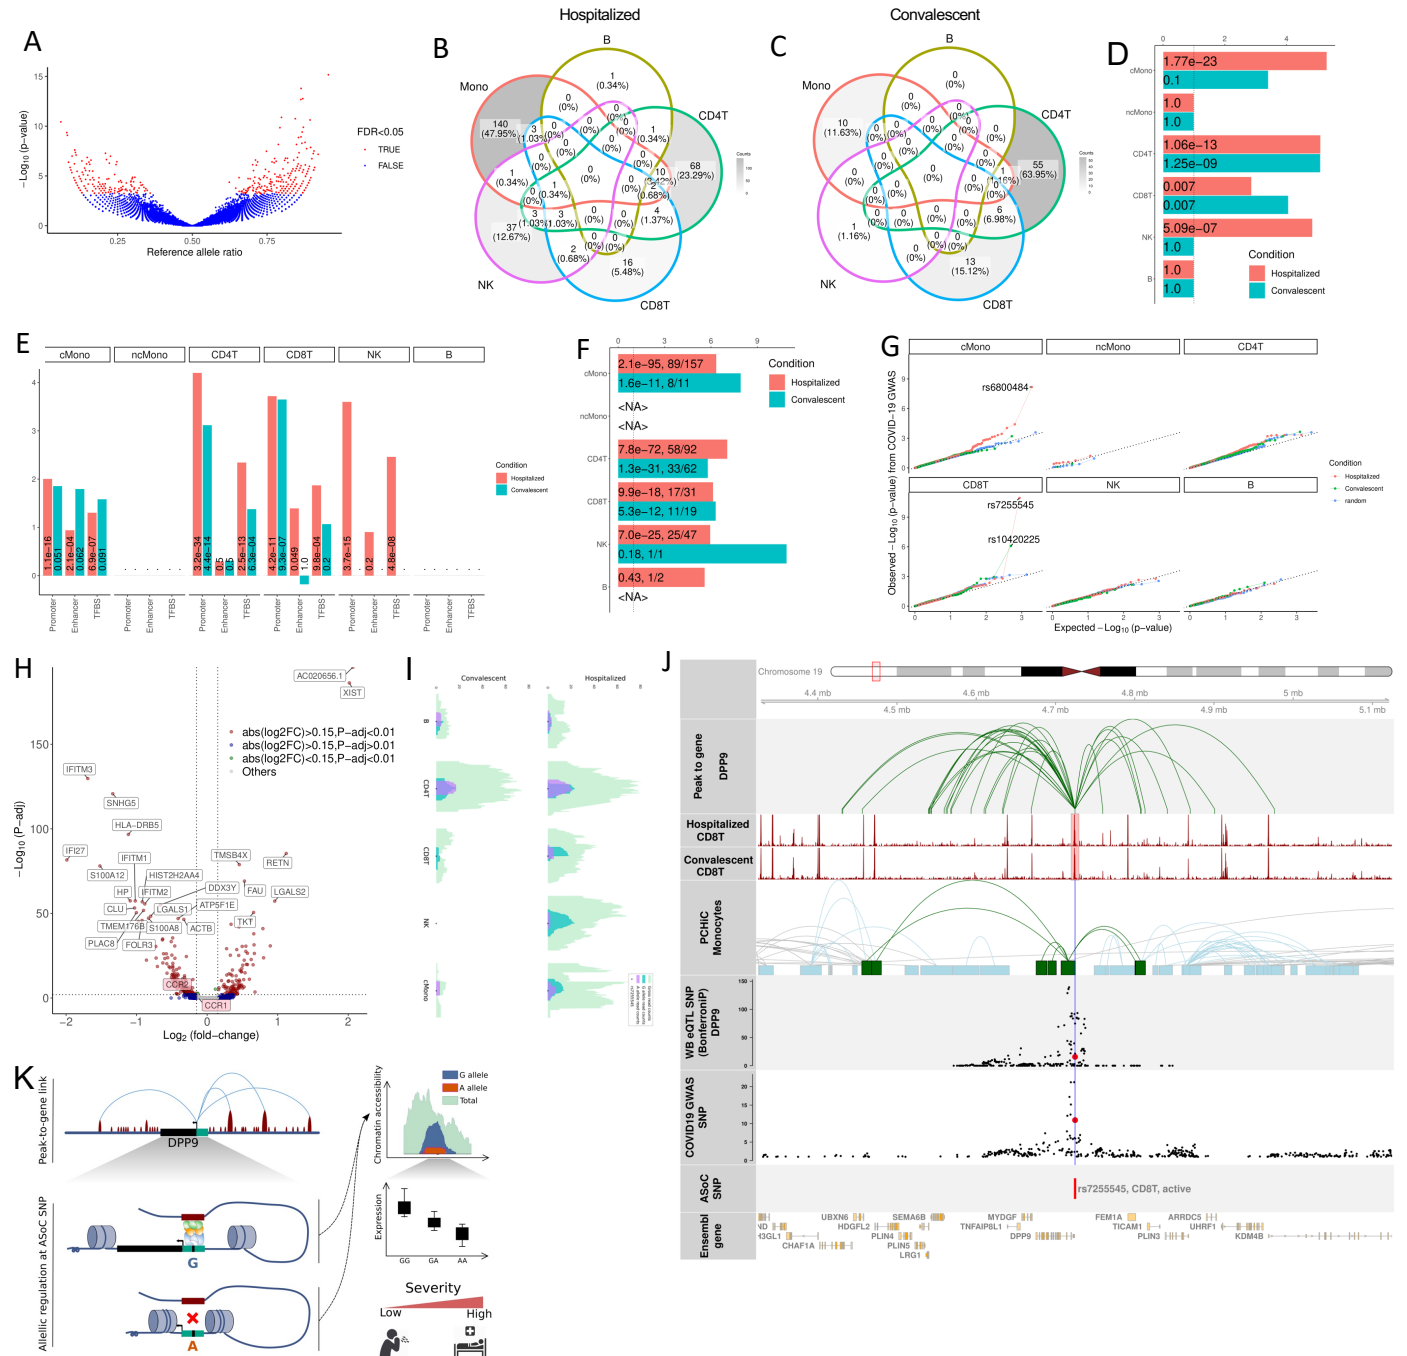

Figure S10. Supplementary information of ASoC analysis, Related to Figure 5.

**A.** Ratio of reference allele of each heterozygous SNPs used in the ASoC analysis. **B.** Number of identified ASoC SNPs in each cell type from hospitalized COVID-19 patients. **C.** Number of identified ASoC SNPs in each cell type from convalescent COVID-19 participants. **D.** Enrichment of ASoC SNPs that were located in open chromatin regions identified in our scATAC-seq analysis. **E.** Enrichment of ASoC SNPs that were located in promoter, enhancer and TFBS per cell type per condition. **F.** Enrichment of ASoC SNPs that were assigned to genes by eQTL analysis from eQTLGen consortium. **G.** QQ plot showing COVID-19 GWAS P-values (“Hospitalized covid vs. population”, release 6) of ASoC SNPs per cell type per condition. **H.** Volcano plot showing the differentially expressed genes between individuals carrying risk alleles (CC) and non-risk allele (TT). **I.** Allele-specific read counts at rs7255545 per cell type per condition. **J.** Data integration illustrated a potential regulatory program showing the effect of rs7255545 in COVID-19. **K.** Schematic plot showing the potential epigenetic and genetic regulating program at DPP9 locus under COVID-19 scenario.
